# Supplementary material
Source: publisher figshare collection journal article supplement (https://gsapubs.figshare.com/ndownloader/files/25800302)
Supplement: Supplementary file 1 [file 25800302]

## Sheet: Sheet1
Table S2. U-Pb age data for zircons in igneous rocks from Cebu and Bohol islands
Analysis Spot	Concentrations (ppm)			Th/U	Isotopic ratios						Isotopic ages (Ma)						Used ages	1σ
	Pb	Th	U		207Pb/206Pb	1σ	207Pb/235U	1σ	206Pb/238U	1σ	207Pb/206Pb	1σ	207Pb/235U	1σ	206Pb/238U	1σ
C9-2: Pyroxene andesite;GPS(10°30.906′N,123°56.146′E)
C9-2-13	7.34837	99.7151	400.881	0.24874	0.0439311	0.00417325	0.104263	0.00854137	0.0172101	0.000342565	n/a	n/a	100.704	7.85419	109.999	2.17177	109.999	2.17177
C9-2-23	9.13808	332.298	392.287	0.847078	0.0503304	0.0054262	0.11625	0.0107539	0.0167471	0.000423859	209.33	233.31	111.667	9.78246	107.065	2.68799	107.065	2.68799
C9-2-2	9.42369	300.201	385.355	0.779024	0.044418	0.00541096	0.106974	0.00793203	0.0174648	0.000406822	n/a	n/a	103.193	7.27607	111.613	2.57823	111.613	2.57823
C9-2-17	9.69978	265.219	428.593	0.618814	0.0518898	0.00352094	0.127199	0.00740668	0.0177761	0.000329207	279.69	155.535	121.577	6.67246	113.585	2.08604	113.585	2.08604
C9-2-21	5.44222	158.868	224.021	0.709165	0.0535072	0.0085805	0.1305	0.0184192	0.0176844	0.00053948	350.055	325.885	124.547	16.5439	113.005	3.41782	113.005	3.41782
C9-2-3	8.13866	278.395	306.072	0.909574	0.0535096	0.00470778	0.133162	0.00884456	0.0180464	0.000414154	350.055	199.975	126.935	7.92574	115.298	2.62322	115.298	2.62322
C9-2-4	5.49729	141.467	215.175	0.657452	0.0518835	0.00610491	0.131235	0.0138416	0.0183425	0.000570617	279.69	248.125	125.207	12.4243	117.172	3.61273	117.172	3.61273
C9-2-18	5.86405	157.082	242.59	0.647522	0.0511019	0.00482347	0.130392	0.0103251	0.0185028	0.000434193	255.62	218.493	124.45	9.275	118.187	2.74888	118.187	2.74888
C9-2-22	5.14069	109.273	231.922	0.471161	0.0514966	0.00579804	0.131805	0.0147986	0.0185583	0.000446327	264.88	237.01	125.718	13.2766	118.538	2.82551	118.538	2.82551
C9-2-5	7.50394	204.417	285.824	0.715185	0.0479089	0.00487958	0.131049	0.0104103	0.0198358	0.000463949	94.535	225.895	125.04	9.34606	126.618	2.93343	126.618	2.93343
C9-2-10	3.22715	82.591	124.868	0.661425	0.053282	0.00780345	0.142355	0.0202987	0.0193732	0.000533824	342.65	299.96	135.139	18.0428	123.693	3.37651	123.693	3.37651
C9-2-11	11.9487	238.167	515.369	0.46213	0.0492036	0.00551764	0.129508	0.0138695	0.0190859	0.000433157	166.75	299.96	123.655	12.4684	121.876	2.74081	121.876	2.74081
C9-2-14	2.78199	38.8685	130.288	0.298327	0.049734	0.00697886	0.132371	0.0146476	0.0193005	0.000562821	183.415	296.255	126.226	13.1346	123.234	3.5601	123.234	3.5601
C9-2-15	5.76405	119.731	245.989	0.486734	0.0526	0.00582478	0.145167	0.0129387	0.0200133	0.000599277	322.28	253.673	137.635	11.4727	127.74	3.78802	127.74	3.78802
C9-2-16	6.26778	199.357	241.228	0.826424	0.0498914	0.00679773	0.129486	0.0125905	0.0188209	0.000634353	190.82	288.85	123.636	11.3189	120.2	4.01428	120.2	4.01428
C9-2-7	10.9882	254.201	380.099	0.668776	0.0505396	0.00458509	0.150294	0.0123293	0.0215629	0.000463086	220.44	196.275	142.172	10.8837	137.526	2.92318	137.526	2.92318
C10-1: Andesitic Pyroclastic rocks;GPS(10°30.908′N,123°56.138′E)
C10-1-1	9.14342	585.901	1523.28	0.384632	0.0419412	0.00296859	0.0301657	0.00196063	0.00521348	8.31914e-05	n/a	n/a	30.1768	1.93261	33.5209	0.533812	33.5209	0.533812
C10-1-2	14.4453	1116.42	2297.5	0.485928	0.0432381	0.00247452	0.0317518	0.0016853	0.00532336	7.57768e-05	n/a	n/a	31.7389	1.6587	34.2256	0.486253	34.2256	0.486253
C10-1-3	8.24308	466.639	1403.37	0.332513	0.0448286	0.00356602	0.0325824	0.00276578	0.00526915	0.000115862	n/a	n/a	32.5561	2.71981	33.8779	0.743207	33.8779	0.743207
C10-1-4	11.219	759.824	1820.36	0.417403	0.0447311	0.00292622	0.0330507	0.00198008	0.00535684	8.38518e-05	n/a	n/a	33.0165	1.94634	34.4402	0.537985	34.4402	0.537985
C10-1-5	16.1248	3155.84	1321.6	2.3879	0.0430339	0.00360859	0.0321363	0.00219472	0.00541431	9.12271e-05	n/a	n/a	32.1173	2.15921	34.8088	0.585222	34.8088	0.585222
C10-1-6	12.1739	736.799	2034.65	0.362126	0.0446819	0.00277411	0.0333902	0.00198968	0.00541833	7.66033e-05	n/a	n/a	33.3501	1.95514	34.8345	0.491515	34.8345	0.491515
C10-1-7	8.81161	701.427	1353.01	0.51842	0.0510666	0.00356341	0.0378191	0.00253813	0.00536993	0.000112921	242.66	161.09	37.6925	2.48339	34.5242	0.724285	34.5242	0.724285
C10-1-8	7.20444	462.313	1155.61	0.400061	0.051579	0.00411789	0.0380579	0.0027976	0.00535032	0.000102656	333.39	183.31	37.9261	2.73662	34.3984	0.658501	34.3984	0.658501
C10-1-9	13.4404	1024.73	2224.47	0.460662	0.0462198	0.00271929	0.0331778	0.00191827	0.00520523	9.85276e-05	9.36	137.02	33.1414	1.88536	33.468	0.632119	33.468	0.632119
C10-1-10	12.5942	1071.2	1833.15	0.584348	0.0461129	0.00324838	0.0347805	0.00226529	0.00546945	0.000101989	n/a	n/a	34.7153	2.22296	35.1622	0.654161	35.1622	0.654161
C10-1-11	14.5194	1599.55	1962.36	0.815114	0.0515432	0.00344467	0.0378759	0.00226315	0.00532888	9.64021e-05	264.88	153.683	37.7481	2.21425	34.261	0.618431	34.261	0.618431
C10-1-12	7.93597	433.801	1369.78	0.316695	0.0434521	0.00429738	0.0324697	0.00281112	0.00541894	0.000124503	n/a	n/a	32.4452	2.76468	34.8384	0.798495	34.8384	0.798495
C10-1-13	14.9151	1717.91	1916.79	0.896242	0.042117	0.00330615	0.0318513	0.00227389	0.00548428	9.30449e-05	n/a	n/a	31.8368	2.2377	35.2574	0.596838	35.2574	0.596838
C10-1-14	8.11377	475.533	1392.68	0.341451	0.0457503	0.00396194	0.0341305	0.00244529	0.00541007	0.000111909	n/a	n/a	34.0772	2.40107	34.7815	0.717776	34.7815	0.717776
C10-1-16	9.18394	531.711	1510.53	0.352004	0.0430882	0.00353166	0.0331337	0.00235672	0.00557666	0.00010127	n/a	n/a	33.0981	2.31634	35.8496	0.649498	35.8496	0.649498
C10-1-17	16.2582	1407.32	2606.93	0.539837	0.0443922	0.00254989	0.0320888	0.0017645	0.00524221	7.32111e-05	n/a	n/a	32.0706	1.73608	33.7052	0.469841	33.7052	0.469841
C10-1-19	8.52085	538.731	1445.81	0.372617	0.0495584	0.00378802	0.0368577	0.00276727	0.00539375	0.000115146	176.01	166.64	36.7515	2.71007	34.6769	0.738536	34.6769	0.738536
C10-1-20	11.8758	1406.17	1586.07	0.886579	0.0523401	0.00332302	0.0383563	0.00209631	0.00531483	8.26334e-05	301.91	144.425	38.218	2.05009	34.1708	0.530194	34.1708	0.530194
C10-1-22	11.3293	812.593	1980.31	0.410337	0.0472936	0.00314696	0.0335328	0.00209203	0.00514839	7.98269e-05	64.91	151.83	33.4902	2.05542	33.1035	0.512274	33.1035	0.512274
C10-1-23	10.4832	883.279	1725.6	0.511868	0.0454179	0.00387006	0.0327725	0.00243545	0.0052395	8.75837e-05	n/a	n/a	32.743	2.39454	33.6878	0.561953	33.6878	0.561953
C10-1-24	16.2979	2065.48	2211.72	0.933881	0.0475493	0.00308026	0.0344227	0.00207243	0.00525572	8.68754e-05	76.02	157.38	34.3641	2.03441	33.7918	0.557406	33.7918	0.557406
C10-1-25	11.4756	754.585	1839.43	0.410228	0.0539839	0.00339487	0.0400458	0.00237044	0.00538355	8.92788e-05	368.57	142.577	39.8688	2.31439	34.6115	0.572751	34.6115	0.572751
C10-1-26	9.00909	520.813	1410.38	0.369271	0.0510081	0.00357762	0.0406002	0.00261324	0.00621923	0.000159645	242.66	158.312	40.4098	2.55006	39.9676	1.023	39.9676	1.023
C10-1-27	7.69652	460.155	1272.52	0.36161	0.0441713	0.00173217	0.0338549	0.00137568	0.00555215	8.70853e-05	n/a	n/a	33.8066	1.3513	35.6924	0.558621	35.6924	0.558621
C10-1-28	9.88135	311.843	355.756	0.876563	0.05339	0.00699333	0.11647	0.0142347	0.0166588	0.000682184	346.35	299.96	111.867	12.9466	106.505	4.32558	106.505	4.32558
C10-1-29	12.398	853.574	2230.3	0.382717	0.0459424	0.00146616	0.0325177	0.00100957	0.00515347	7.12526e-05	n/a	n/a	32.4924	0.993066	33.1361	0.457319	33.1361	0.457319
C10-1-30	8.7157	545.648	1547.22	0.352662	0.0475655	0.00192459	0.0336457	0.001363	0.00513819	6.98822e-05	76.02	96.285	33.6011	1.33911	33.0381	0.448542	33.0381	0.448542
C10-1-31	11.1066	585.019	1900.21	0.307871	0.0481664	0.00159953	0.0361443	0.00127128	0.00546198	9.30569e-05	105.645	74.9925	36.0526	1.24604	35.1144	0.596926	35.1144	0.596926
C10-1-32	9.84717	589.814	1708.3	0.345263	0.0502748	0.00194178	0.0377414	0.00162669	0.00541627	8.13515e-05	209.33	86.0975	37.6165	1.59185	34.8213	0.521939	34.8213	0.521939
C10-1-33	7.79374	433.769	1400.8	0.309658	0.0502489	0.00212052	0.0367381	0.00160725	0.00535622	0.000104066	205.63	98.1325	36.6344	1.57434	34.4363	0.667536	34.4363	0.667536
C10-1-35	9.37265	913.198	1606.8	0.568332	0.046899	0.001758	0.0340509	0.00132316	0.00526788	8.71889e-05	42.69	88.88	33.9991	1.29947	33.8698	0.559409	33.8698	0.559409
C10-1-36	9.48116	550.427	1665.49	0.330491	0.0444526	0.0015322	0.0327312	0.001136	0.00533668	8.07544e-05	n/a	n/a	32.7024	1.11714	34.311	0.518144	34.311	0.518144
C10-1-37	11.5665	765.68	2023.78	0.378341	0.0474824	0.00157466	0.0347658	0.00116251	0.00531146	7.66578e-05	72.315	77.77	34.7009	1.14098	34.1493	0.491903	34.1493	0.491903
C10-1-38	5.34844	294.516	932.999	0.315665	0.0517552	0.00253144	0.0382332	0.00179065	0.00541493	8.89079e-05	275.99	108.317	38.0976	1.75144	34.8127	0.570361	34.8127	0.570361
C10-1-39	11.6629	752.808	2066.69	0.364258	0.046945	0.00160246	0.03447	0.00121424	0.00529144	7.34964e-05	55.65	72.215	34.4105	1.19206	34.0209	0.471652	34.0209	0.471652
C10-1-41	5.80754	267.446	1022.85	0.261471	0.0476223	0.00253787	0.0363606	0.00205653	0.00548468	9.12882e-05	79.72	131.465	36.2646	2.01505	35.2599	0.585581	35.2599	0.585581
C10-1-42	10.6145	725.292	1982.5	0.365847	0.0481684	0.00178064	0.0329943	0.00121994	0.00496878	6.99282e-05	109.35	87.0275	32.961	1.19936	31.9515	0.448889	31.9515	0.448889
C10-1-43	10.0881	636.128	1776.56	0.358067	0.0484586	0.00200228	0.0346831	0.00136531	0.00522804	7.49665e-05	120.46	98.135	34.6196	1.34005	33.6143	0.481094	33.6143	0.481094
C10-1-45	13.0427	1107.84	2297.54	0.482184	0.0479599	0.00159808	0.0343124	0.00121954	0.00515728	7.07417e-05	98.24	79.6225	34.2558	1.19745	33.1605	0.454044	33.1605	0.454044
C10-1-46	14.0315	1588.34	2469.37	0.643216	0.0469666	0.00176956	0.0324089	0.00122912	0.00501917	7.10061e-05	55.65	144.425	32.3855	1.20905	32.2748	0.455782	32.2748	0.455782
C10-1-47	12.059	948.261	2166	0.437794	0.0491459	0.00180744	0.0338831	0.00117005	0.00505927	6.96982e-05	153.79	87.0225	33.8343	1.14934	32.5319	0.447387	32.5319	0.447387
C10-1-48	9.36052	724.943	1514.51	0.478665	0.05197	0.00215307	0.0397612	0.00166351	0.00561243	9.45786e-05	283.395	94.43	39.5908	1.62473	36.0789	0.606603	36.0789	0.606603
C10-1-49	7.88619	496.943	1359.44	0.36555	0.0495241	0.00220567	0.0363236	0.00159516	0.00541837	9.03533e-05	172.305	103.688	36.2283	1.56312	34.8347	0.579621	34.8347	0.579621
C15-1: Andesite; GPS(10°19.449′N,123°47.851′E)
C15-1-3	9.48661	464.132	418.746	1.10838	0.0516093	0.0052963	0.101549	0.0107092	0.0142687	0.000307303	333.39	237.01	98.2053	9.87173	91.3317	1.95376	91.3317	1.95376
C15-1-8	32.4866	1970.19	1320.18	1.49236	0.0489788	0.0027261	0.0933402	0.00497222	0.013819	0.000196918	146.38	131.463	90.6102	4.6181	88.4728	1.25303	88.4728	1.25303
C15-1-9	32.8846	1844.17	1273.69	1.44789	0.0493117	0.00246946	0.101516	0.00490437	0.0149281	0.000211979	161.195	116.65	98.1749	4.52136	95.5212	1.34739	95.5212	1.34739
C15-1-16	6.36192	269.117	260.554	1.03287	0.0473552	0.00565359	0.105842	0.0118933	0.0162072	0.000429448	77.87	249.965	102.155	10.9207	103.641	2.72482	103.641	2.72482
C15-1-19	8.55943	362.362	343.926	1.0536	0.0498398	0.00504491	0.114285	0.00888391	0.0166273	0.000401759	187.12	222.19	109.878	8.09573	106.305	2.54819	106.305	2.54819
C15-1-20	18.2967	654.915	665.826	0.983614	0.0526901	0.00537089	0.140922	0.013686	0.0193936	0.000438475	322.28	233.305	133.864	12.1804	123.822	2.77362	123.822	2.77362
C15-1-13	31.8074	636.744	901.381	0.70641	0.049781	0.00329278	0.17305	0.00927726	0.0252085	0.000505901	183.415	149.055	162.062	8.03109	160.49	3.18224	160.49	3.18224
C15-1-2	8.04885	86.7781	169.981	0.510517	0.055188	0.00412492	0.296727	0.0208486	0.0389909	0.000815297	420.42	173.127	263.841	16.3261	246.575	5.06026	246.575	5.06026
C15-1-7	11.2297	55.167	280.596	0.196607	0.0551128	0.00354306	0.299469	0.0181152	0.0394013	0.000609926	416.715	144.43	265.985	14.1561	249.121	3.78518	249.121	3.78518
C15-1-10	23.6662	215.71	503.218	0.42866	0.0509609	0.00254902	0.283215	0.0142816	0.0402996	0.000551022	238.955	114.797	253.204	11.3021	254.69	3.41728	254.69	3.41728
C15-1-17	117.573	782.495	2739.07	0.285679	0.0525472	0.00154883	0.290599	0.00864272	0.040101	0.000476398	309.32	68.5125	259.03	6.80198	253.459	2.95582	253.459	2.95582
C15-1-21	13.2849	96.3567	315.025	0.30587	0.0502072	0.0134718	0.257541	0.0400245	0.0371958	0.00201829	211.185	520.305	232.683	32.3176	235.428	12.5448	235.428	12.5448
C15-1-4	36.697	122.212	516.396	0.236663	0.0635727	0.00281359	0.579348	0.0250299	0.0660812	0.00135649	727.785	94.435	464.042	16.0951	412.503	8.2055	412.503	8.2055
C15-1-22	17.8138	92.5268	224.005	0.413058	0.0557441	0.00471238	0.536276	0.0441546	0.0697605	0.00227271	442.64	188.865	435.966	29.1849	434.713	13.6975	434.713	13.6975
C15-1-5	20.2714	56.9208	133.462	0.426495	0.0663538	0.0034424	1.18981	0.0611791	0.130023	0.00210308	816.665	109.252	795.872	28.373	787.998	12.0049	787.998	12.0049
C15-1-6	18.2085	47.6511	123.9	0.384595	0.0716559	0.00362247	1.26047	0.0635197	0.127553	0.00210805	975.93	99.0775	828.12	28.538	773.892	12.0593	773.892	12.0593
C15-1-11	65.4187	85.8613	141.077	0.608615	0.123352	0.00434867	5.94395	0.205591	0.349426	0.0053918	2005.25	61.875	1967.68	30.0924	1931.86	25.7786	2005.25	61.875
C15-1-15	74.3373	89.9534	188.237	0.477874	0.111341	0.00342835	4.88374	0.154406	0.318069	0.00430601	1821.3	55.715	1799.45	26.6747	1780.29	21.0818	1821.3	55.715
C17-1: Andesite; GPS(10°19.089′N,123°46.816′E)
C17-1-4	8.83785	336.561	394.462	0.853216	0.0509707	0.00479112	0.107579	0.00982707	0.0153034	0.000350021	238.955	218.493	103.748	9.00933	97.9047	2.223	97.9047	2.223
C17-1-5	39.3155	2546.34	1155.21	2.20423	0.0486737	0.00589213	0.0922595	0.00980264	0.0137636	0.000353464	131.57	262.925	89.606	9.11291	88.1208	2.24814	88.1208	2.24814
C17-1-2	11.7906	455.913	316.06	1.44249	0.0540281	0.00417698	0.155105	0.0104384	0.0208168	0.000437536	372.275	175.903	146.41	9.17635	132.816	2.76395	132.816	2.76395
C17-1-1	6.30189	61.6245	140.083	0.439912	0.0493438	0.00404505	0.261895	0.018933	0.0384874	0.000882382	164.9	181.45	236.193	15.2353	243.45	5.47897	243.45	5.47897
C17-1-7	15.2411	127.51	364.347	0.349969	0.0514409	0.00303695	0.26364	0.0152858	0.0371586	0.000579416	261.175	135.165	237.596	12.2838	235.196	3.60358	235.196	3.60358
C17-1-8	13.3812	162.699	306.285	0.531202	0.0475821	0.00646842	0.239808	0.0339665	0.0365802	0.00102395	79.72	292.555	218.264	27.8184	231.601	6.36908	231.601	6.36908
C17-1-9	11.5905	96.9269	259.945	0.372875	0.051098	0.0033418	0.276917	0.0177958	0.0392911	0.000749752	255.62	151.83	248.209	14.1519	248.438	4.65242	248.438	4.65242
C17-1-10	10.2017	67.7232	250.818	0.270009	0.051364	0.00343165	0.262749	0.0151519	0.0370877	0.000790672	257.47	186.088	236.88	12.1848	234.756	4.91636	234.756	4.91636
C17-1-3	49.961	347.626	1104.2	0.31482	0.0540229	0.00185493	0.303176	0.0104098	0.0406922	0.000479064	372.275	77.77	268.878	8.11296	257.122	2.97074	257.122	2.97074
C17-1-6	11.7829	30.913	63.6456	0.485705	0.072589	0.00425955	1.51193	0.0923461	0.151016	0.00393572	1011.11	118.517	935.221	37.3339	906.658	22.0479	906.658	22.0479
C19-1: Basaltic andesite; GPS(10°18.864′N,123°41.715′E)
C19-1-1	1.76233	115.726	225.966	0.512138	0.0469154	0.012655	0.0375738	0.00690722	0.00581026	0.000251819	55.65	531.415	37.4525	6.75954	37.3469	1.61408	37.3469	1.61408
C19-1-7	4.84944	323.136	663.133	0.487286	0.044841	0.00618718	0.0371088	0.00464807	0.00600363	0.000191243	n/a	n/a	36.9973	4.55077	38.5862	1.22565	38.5862	1.22565
C19-1-8	6.613	670.552	724.743	0.925228	0.0500527	0.005254	0.0443994	0.00341743	0.00643551	0.000181654	198.23	235.15	44.1103	3.32262	41.353	1.16374	41.353	1.16374
C19-1-11	2.9414	191.075	349.175	0.547218	0.0494261	0.00927988	0.044879	0.00489712	0.00658746	0.000208955	168.6	398.1	44.5764	4.75897	42.3263	1.33839	42.3263	1.33839
C19-1-12	1.3316	94.4756	184.182	0.512948	0.051551	0.034432	0.044207	0.0289604	0.00622104	0.000466355	264.88	1074.01	43.9232	28.161	39.9791	2.98781	39.9791	2.98781
C19-1-13	1.9184	116.952	224.967	0.519865	0.0444913	0.0149017	0.0373018	0.0106999	0.00608176	0.000312955	n/a	n/a	37.1863	10.4738	39.0868	2.00535	39.0868	2.00535
C19-1-14	1.89682	82.4639	233.219	0.35359	0.044821	0.0250211	0.0402238	0.012043	0.00650924	0.000382847	n/a	n/a	40.0426	11.7554	41.8252	2.45213	41.8252	2.45213
C19-1-17	3.19855	63.9344	169.527	0.377133	0.0491061	0.0138409	0.116961	0.0172747	0.0172731	0.00162839	153.79	551.775	112.313	15.7039	110.399	10.3192	110.399	10.3192
C19-1-16	205.283	234.187	1438.09	0.162846	0.0680736	0.00162571	1.31713	0.0336971	0.140321	0.00201329	872.215	50	853.256	14.7777	846.479	11.3906	846.479	11.3906
C19-1-5	255.496	24.2655	596.312	0.0406927	0.157471	0.00424234	8.77588	0.244162	0.404226	0.005623	2428.7	45.2125	2314.99	25.409	2188.47	25.8407	2428.7	45.2125
C19-5: Andesitic Pyroclastic rocks; GPS(10°18.864′N,123°41.715′E)
C19-5-17	8.35291	575.314	1448.91	0.397066	0.0512411	0.00470566	0.0350626	0.00262429	0.00496169	0.000119865	250.065	208.308	34.9921	2.5745	31.906	0.769079	31.906	0.769079
C19-5-21	7.65176	499.468	1218.12	0.410031	0.0449064	0.00416231	0.0339512	0.00256215	0.00548221	0.000115153	n/a	n/a	33.9012	2.51624	35.2441	0.738519	35.2441	0.738519
C19-5-3	3.86469	90.098	171.077	0.526652	0.0506601	0.00729747	0.124284	0.0155426	0.017788	0.000575019	233.4	294.415	118.949	14.0374	113.661	3.64255	113.661	3.64255
C19-5-5	8.32984	189.546	386.36	0.490595	0.0531438	0.00563318	0.130629	0.0104302	0.0178225	0.000411745	344.5	245.34	124.663	9.36741	113.879	2.60853	113.879	2.60853
C19-5-11	2.56358	54.2106	120.333	0.450506	0.0453941	0.00876157	0.110611	0.015186	0.0176686	0.000642071	n/a	n/a	106.524	13.8841	112.905	4.06765	112.905	4.06765
C19-5-12	1.46605	33.3985	77.8534	0.428992	0.0482718	0.0154102	0.110562	0.0317063	0.0166079	0.00125703	122.31	609.18	106.479	28.989	106.182	7.97114	106.182	7.97114
C19-5-22	13.3392	435.714	562.317	0.774855	0.0474969	0.004114	0.11186	0.00805898	0.0170784	0.000396301	76.02	257.37	107.665	7.36006	109.165	2.51251	109.165	2.51251
C19-5-1	7.71166	161.003	346.382	0.464812	0.0511801	0.0044199	0.131336	0.00929785	0.0186062	0.000382444	255.62	199.975	125.297	8.34533	118.841	2.42121	118.841	2.42121
C19-5-6	2.83103	70.4526	120.261	0.58583	0.0508527	0.00803848	0.129818	0.0144915	0.01851	0.000646661	235.25	329.6	123.934	13.024	118.232	4.09338	118.232	4.09338
C19-5-8	19.6107	128.555	1057.61	0.121553	0.0482194	0.00251036	0.126717	0.00629116	0.0190549	0.000311325	109.35	118.495	121.144	5.67011	121.68	1.9705	121.68	1.9705
C19-5-13	5.23821	83.7216	259.362	0.322798	0.0444326	0.00434229	0.112837	0.00939411	0.0184142	0.000416684	n/a	n/a	108.557	8.57176	117.626	2.63832	117.626	2.63832
C19-5-14	2.3552	39.1292	111.51	0.350901	0.0504579	0.0148777	0.132178	0.0271691	0.0189947	0.00097414	216.74	568.14	126.053	24.3665	121.3	6.163	121.3	6.163
C19-5-16	6.08465	137.453	264.809	0.519066	0.0494055	0.00408506	0.12856	0.00850055	0.0188684	0.000461175	168.6	181.455	122.803	7.64853	120.5	2.9186	120.5	2.9186
C19-5-18	3.36666	57.3657	156.878	0.36567	0.0499564	0.0058923	0.129805	0.0117984	0.018841	0.000551006	194.525	261.075	123.922	10.6039	120.327	3.48693	120.327	3.48693
C19-5-15	38.6019	410.097	870.656	0.47102	0.0540296	0.00221403	0.277589	0.0111215	0.0372541	0.000460486	372.275	92.5825	248.743	8.84063	235.79	2.8647	235.79	2.8647
C19-5-24	5.54336	65.199	96.3971	0.676358	0.0550036	0.00591326	0.321459	0.0331883	0.0423812	0.00106754	413.01	240.705	283.024	25.502	267.576	6.60359	267.576	6.60359
C19-5-25	8.33002	92.1529	168.836	0.545813	0.0482725	0.00411414	0.263369	0.0207237	0.0395635	0.000888613	122.31	179.6	237.378	16.6566	250.127	5.51202	250.127	5.51202
C19-8: Andesitic Pyroclastic rocks; GPS(10°18.864′N,123°41.715′E)
C19-8-3	2.43478	176.806	259.145	0.682267	0.0458295	0.0164628	0.0386864	0.00716245	0.00612035	0.000276175	n/a	n/a	38.5407	7.0018	39.3341	1.76963	39.3341	1.76963
C19-8-5	12.0938	931.795	1700.81	0.547855	0.0483462	0.00644727	0.0367825	0.00452815	0.00551799	0.000288421	116.755	349.955	36.6778	4.43476	35.4735	1.84918	35.4735	1.84918
C19-8-6	1.15709	73.873	191.931	0.384892	0.0500365	0.0402672	0.0416357	0.00932957	0.00603544	0.000666942	198.23	1233.56	41.4198	9.09448	38.79	4.27364	38.79	4.27364
C19-8-7	1.76131	117.518	238.301	0.493149	0.0501495	0.0169924	0.0402569	0.00658667	0.00582269	0.000338032	211.185	631.405	40.0749	6.42923	37.4266	2.16657	37.4266	2.16657
C19-8-11	16.6622	1689.93	2280.3	0.7411	0.0505805	0.00519989	0.0369169	0.00379705	0.00529405	0.000129775	220.44	222.2	36.8095	3.71828	34.0376	0.832379	34.0376	0.832379
C19-8-14	9.0343	482.098	1457.43	0.330786	0.0503225	0.00381545	0.0381041	0.00261188	0.00549056	0.000112801	209.33	171.275	37.9713	2.55484	35.2976	0.723445	35.2976	0.723445
C19-8-20	7.55041	366.531	1140.9	0.321263	0.0479219	0.0101943	0.0369438	0.00601922	0.00558981	0.00022072	94.535	505.49	36.8358	5.89411	35.9339	1.41508	35.9339	1.41508
C19-8-21	8.71038	862.183	1073.49	0.803162	0.0482959	0.00662618	0.037524	0.0038883	0.0056336	0.000167596	122.31	287	37.4038	3.80541	36.2146	1.07452	36.2146	1.07452
C19-8-4	64.4964	3377.18	2110.49	1.60019	0.0532928	0.00277321	0.131708	0.0067747	0.017923	0.00027476	342.65	116.655	125.632	6.07895	114.516	1.74113	114.516	1.74113
C19-8-13	60.7664	1513.65	2660.33	0.568972	0.0532383	0.00203006	0.131686	0.00504	0.0179396	0.000263988	338.945	91.6575	125.612	4.52285	114.621	1.67293	114.621	1.67293
C19-8-15	5.04084	107.602	231.369	0.465068	0.0518711	0.00779869	0.12671	0.025233	0.0177129	0.000698993	279.69	311.08	121.137	22.7399	113.185	4.428	113.185	4.428
C19-8-16	54.1046	1408.26	2399.76	0.586834	0.0519252	0.00286741	0.125556	0.00637056	0.0175332	0.00033949	283.395	158.312	120.097	5.74757	112.047	2.15163	112.047	2.15163
C19-8-17	46.1639	1333.24	2017.47	0.660847	0.0488831	0.00222825	0.116779	0.00549024	0.0173222	0.000251044	142.68	112.02	112.148	4.99234	110.71	1.5919	110.71	1.5919
C19-8-2	9.38737	204.381	386.528	0.52876	0.0494236	0.00413059	0.134602	0.0106891	0.0197462	0.000426272	168.6	185.16	128.224	9.56634	126.052	2.69557	126.052	2.69557
C19-8-12	42.6421	1366.69	1418.66	0.963369	0.0501625	0.00362215	0.142185	0.0102014	0.0205589	0.000537673	211.185	163.868	134.988	9.06937	131.187	3.39698	131.187	3.39698
C20: Pyroxene andesite; GPS(10°27.274′N,123°47.172′E)
C20-1	151.495	8427.06	3114.92	2.70538	0.0534524	0.00199266	0.123938	0.00450664	0.0168152	0.00024833	346.35	85.1775	118.636	4.07217	107.497	1.57544	107.497	1.57544
C20-6	14.3178	142.651	301.435	0.473241	0.0564317	0.00439658	0.297801	0.0201222	0.0382721	0.000811882	477.82	172.2	264.681	15.7444	242.114	5.0425	242.114	5.0425
C20-9	55.2719	347.661	652.734	0.532622	0.0563495	0.00198696	0.534449	0.0194328	0.0687524	0.000881884	464.86	77.77	434.758	12.8626	428.635	5.32431	428.635	5.32431
C20-10	142.921	1744.9	1109.22	1.57309	0.0686179	0.00236193	0.659494	0.0223368	0.069676	0.000982687	887.035	76.0825	514.304	13.6715	434.204	5.92681	434.204	5.92681
C20-7	164.118	211.584	982.09	0.215443	0.0704636	0.00204946	1.57394	0.0696359	0.161988	0.00363435	942.59	64.97	959.982	27.4781	967.816	20.1692	967.816	20.1692
C20-2	129.685	112.16	510.627	0.219651	0.0841224	0.00218785	2.81454	0.0736406	0.242649	0.00282128	1295.37	51.08	1359.42	19.624	1400.45	14.6553	1295.37	51.08
C20-3	115.853	108.934	423.391	0.257289	0.0862038	0.00223787	3.02548	0.0791085	0.254542	0.00301406	1342.59	50.3075	1414.07	19.9774	1461.86	15.5077	1342.59	50.3075
C21: Basaltic andesitic - andesitic pyroclastic rocks; GPS(10°25.141′N,123°47.951′E)
C21-3	14.8487	638.891	397.293	1.60811	0.0512499	0.00774382	0.135916	0.01774	0.0192231	0.000674376	253.77	314.78	129.4	15.8578	122.744	4.26583	122.744	4.26583
C21-10	3.1944	128.873	102.526	1.25698	0.0481359	0.00757661	0.125939	0.0146419	0.0189742	0.000636421	105.645	336.995	120.442	13.2045	121.17	4.02677	121.17	4.02677
C21-7	10.6512	95.3792	226.856	0.420439	0.0512375	0.00362914	0.28841	0.0186633	0.0408257	0.000842518	250.065	162.942	257.307	14.7094	257.949	5.22005	257.949	5.22005
C21-9	12.578	90.9268	297.264	0.305879	0.0502564	0.00332048	0.268274	0.0158598	0.0387148	0.000639707	205.63	149.055	241.313	12.6984	244.862	3.97232	244.862	3.97232
C21-12	13.3067	72.0853	312.412	0.230738	0.0550145	0.00336376	0.30337	0.0170612	0.039986	0.00067175	413.01	104.62	269.029	13.2927	252.746	4.16612	252.746	4.16612
C21-13	15.5692	110.028	366.704	0.300047	0.0589869	0.00402505	0.307134	0.020102	0.0377555	0.000601588	564.85	149.98	271.957	15.6163	238.905	3.73922	238.905	3.73922
C21-15	14.7451	112.731	330.572	0.341017	0.0561111	0.00282643	0.302401	0.0151057	0.0390783	0.000643072	457.45	111.1	268.273	11.7782	247.117	3.99184	247.117	3.99184
C21-21	17.9632	138.706	410.979	0.337502	0.0565537	0.00263108	0.306728	0.0137712	0.0393275	0.000594639	475.97	101.843	271.642	10.7024	248.663	3.69068	248.663	3.69068
C21-1	12.6126	117.112	267.23	0.438244	0.0488827	0.00340426	0.277579	0.0176996	0.0411804	0.000731228	142.68	155.53	248.736	14.0681	260.146	4.52954	260.146	4.52954
C21-2	17.2537	97.7553	395.781	0.246994	0.052364	0.00292189	0.303289	0.0165972	0.0420051	0.000666323	301.91	132.39	268.966	12.9321	265.249	4.12473	265.249	4.12473
C21-19	15.8051	92.9534	323.737	0.287126	0.0521658	0.0030346	0.311253	0.020154	0.0432637	0.000934001	300.06	133.315	275.152	15.6076	273.031	5.77315	273.031	5.77315
C21-11	16.357	76.9273	337.119	0.22819	0.0555887	0.00318345	0.352116	0.0190484	0.0459321	0.00104052	435.23	132.395	306.312	14.3061	289.499	6.41497	289.499	6.41497
C21-4	15.8011	66.5221	307.148	0.21658	0.0532997	0.00300153	0.353332	0.0190153	0.0480799	0.000758956	342.65	127.765	307.224	14.2684	302.722	4.67096	302.722	4.67096
C21-5	32.8231	72.6447	463.82	0.156623	0.0556307	0.00236944	0.550817	0.0256522	0.0718132	0.0015349	438.935	96.2875	445.532	16.7983	447.07	9.23481	447.07	9.23481
C21-17	66.1591	251.726	775.986	0.324395	0.0579254	0.00193488	0.606219	0.0205917	0.0758854	0.000880491	527.815	72.21	481.173	13.0213	471.516	5.2818	471.516	5.2818
C21-27	20.5125	142.647	209.321	0.681477	0.0570479	0.00297788	0.58978	0.0328561	0.0749638	0.00149346	494.485	116.65	470.727	20.9874	465.992	8.95959	465.992	8.95959
C21-16	86.8546	576.562	735.216	0.784208	0.0552244	0.00193021	0.65727	0.0231909	0.0863003	0.00104779	420.42	77.77	512.942	14.213	533.62	6.22456	533.62	6.22456
C21-20	34.8671	74.8298	239.228	0.312797	0.0660413	0.00266692	1.18279	0.0467117	0.129863	0.00245959	809.26	89.81	792.611	21.7359	787.087	14.0396	787.087	14.0396
C21-22	20.6044	79.0611	172.633	0.457973	0.0664016	0.00327644	0.925442	0.0445305	0.10106	0.0014366	820.37	99.07	665.234	23.4876	620.615	8.4176	620.615	8.4176
C21-24	77.2026	37.3746	570.917	0.0654641	0.0711824	0.00251619	1.3902	0.050138	0.141616	0.00190518	962.65	72.225	884.781	21.3077	853.793	10.7679	853.793	10.7679
C21-6	53.7141	146.259	197.366	0.741053	0.0747069	0.00270599	2.07309	0.0796383	0.201266	0.00297726	1061.12	72.225	1139.95	26.3248	1182.12	15.9898	1061.12	72.225
C21-8	117.768	189.584	520.662	0.36412	0.0805847	0.00241977	2.18528	0.0665004	0.196678	0.00247794	1212.96	59.2525	1176.36	21.2137	1157.45	13.3631	1212.96	59.2525
C21-25	73.7247	137.501	396.486	0.346799	0.0800896	0.00271226	1.86588	0.0665652	0.168933	0.00290726	1199.08	66.66	1069.07	23.5953	1006.23	16.0421	1199.08	66.66
C21-28	17.0858	169.819	427.333	0.397392	0.0530472	0.0016394	0.282228	0.00857155	0.0385806	0.000532037	331.54	70.365	252.423	6.78989	244.029	3.30495	244.029	3.30495
C21-29	273.809	223.037	544.061	0.409947	0.178163	0.0027352	11.375	0.272842	0.458226	0.00823033	2636.11	25.62	2554.38	22.4542	2431.72	36.4077	2636.11	25.62
C21-30	55.5653	448.047	595.303	0.752637	0.0577407	0.00124432	0.655754	0.0144255	0.0820287	0.000984819	520.41	46.2925	512.013	8.85322	508.221	5.87368	508.221	5.87368
C21-31	14.6932	66.0218	369.555	0.178652	0.0503148	0.00247095	0.291118	0.0147851	0.0420845	0.000796341	209.33	110.17	259.439	11.6289	265.741	4.92832	265.741	4.92832
C21-32	13.9137	93.5485	341.407	0.274009	0.0550023	0.00196511	0.304138	0.0109508	0.040066	0.000606103	413.01	84.25	269.627	8.52808	253.242	3.75916	253.242	3.75916
C21-33	11.72	64.2759	287.079	0.223896	0.0518542	0.00315602	0.296114	0.016484	0.0422198	0.000804613	279.69	140.72	263.36	12.9149	266.578	4.97883	266.578	4.97883
C21-34	14.2033	171.604	340.361	0.504183	0.0508071	0.00179527	0.278124	0.00978016	0.039836	0.000662304	231.55	86.0975	249.168	7.77153	251.817	4.10817	251.817	4.10817
C21-35	38.8681	82.3201	172.428	0.477417	0.0818987	0.00185398	2.37615	0.0611451	0.208678	0.00296104	1242.59	44.445	1235.45	18.4087	1221.77	15.8063	1242.59	44.445
C21-36	21.5799	125.541	472.378	0.265765	0.0556817	0.0015669	0.351687	0.0118071	0.0455975	0.000968502	438.935	62.955	305.989	8.87191	287.436	5.97312	287.436	5.97312
C21-38	198.912	384.99	646.526	0.595475	0.0969493	0.00163415	3.70786	0.0770901	0.275374	0.00387225	1566.36	26.85	1573.07	16.661	1568.02	19.5907	1566.36	26.85
C21-39	65.5665	69.9936	723.092	0.0967975	0.0652113	0.00160393	0.830674	0.0199879	0.0924756	0.00143408	781.17	51.8475	613.986	11.0942	570.161	8.46775	570.161	8.46775
C21-40	42.0359	92.8374	357.832	0.259444	0.0706507	0.00156837	1.08704	0.0300755	0.110586	0.00189109	946.29	45.215	747.064	14.6411	676.152	10.9829	676.152	10.9829
C21-41	38.8114	266.442	290.13	0.918354	0.0667382	0.00163739	1.01431	0.0288838	0.109674	0.00189958	829.32	51.08	711.05	14.5679	670.855	11.0411	670.855	11.0411
C21-42	13.5309	82.0147	311.533	0.263262	0.0529042	0.00310174	0.30967	0.0173164	0.0427137	0.000783496	324.13	133.315	273.925	13.4266	269.632	4.84603	269.632	4.84603
C21-43	43.7859	718.587	873.352	0.822792	0.052824	0.00148357	0.303405	0.00890822	0.0417055	0.000672287	320.43	62.9575	269.056	6.94212	263.396	4.16276	263.396	4.16276
C21-45	1.10259	31.2193	52.4489	0.595232	0.0664921	0.0123301	0.132916	0.0214381	0.0181549	0.000664587	821.91	396.27	126.714	19.2142	115.984	4.20828	115.984	4.20828
C21-46	8.98773	136.381	62.8436	2.17017	0.0616407	0.00302509	0.766409	0.0377092	0.0905344	0.00157987	661.125	105.54	577.701	21.6799	558.697	9.34388	558.697	9.34388
C21-47	40.2938	134.992	219.893	0.6139	0.0721237	0.00156305	1.61696	0.039282	0.161659	0.00230898	990.74	43.37	976.812	15.2559	965.992	12.8239	965.992	12.8239
C21-48	293.764	82.7701	952.048	0.086939	0.11559	0.00183163	4.89286	0.100028	0.304077	0.00420745	1900	28.2375	1801.03	17.279	1711.5	20.8191	1900	28.2375
C21-49	467.897	210.884	578.577	0.364488	0.293234	0.00447333	26.1696	0.437979	0.642225	0.0069973	3434.88	23.7675	3352.9	16.5262	3197.76	27.5215	3434.88	23.7675
C21-50	255.253	527.455	1460.48	0.361152	0.0707983	0.00124543	1.67792	0.0336045	0.170573	0.00235518	951.54	35.1875	1000.19	12.7599	1015.27	12.9817	951.54	35.1875
C21-51	52.2004	139.514	243.358	0.573288	0.0750702	0.00169209	2.02291	0.0501415	0.194013	0.00296697	1072.22	41.665	1123.24	16.8596	1143.08	16.0304	1072.22	41.665
C21-52	175.203	430.614	826.556	0.520973	0.0812134	0.00154294	2.30048	0.0535162	0.20296	0.00300776	1227.78	38.115	1212.44	16.4847	1191.2	16.1308	1227.78	38.115
C21-53	15.3203	144.757	363.739	0.397969	0.0540252	0.00208158	0.306173	0.0123862	0.040897	0.000804112	372.275	87.0275	271.211	9.63047	258.39	4.98193	258.39	4.98193
C21-54	56.8397	152.573	514.673	0.296446	0.068118	0.00124057	0.998949	0.0361202	0.105308	0.003712	872.215	37.04	703.276	18.3496	645.439	21.6493	645.439	21.6493
C21-55	161.057	217.42	806.965	0.269429	0.0801847	0.00142575	2.19843	0.0547464	0.196058	0.00320116	1266.66	34.8725	1180.55	17.3985	1154.11	17.2646	1266.66	34.8725
C21-56	1099.29	987.485	1765.24	0.559407	0.243015	0.00353314	17.4969	0.388284	0.518065	0.00989536	3139.82	23.15	2962.48	21.4098	2690.97	42.0454	3139.82	23.15
C21-57	24.3781	62.3586	176.988	0.352332	0.0667825	0.00170954	1.23818	0.0322163	0.133976	0.00187459	831.48	53.7	818.059	14.626	810.506	10.6656	810.506	10.6656
C21-58	15.8305	66.5003	109.94	0.604878	0.0678312	0.00216324	1.22397	0.0392064	0.13073	0.00208719	864.81	65.8925	811.589	17.9087	792.027	11.907	792.027	11.907
C21-59	18.1042	242.374	415.116	0.583871	0.054376	0.00185803	0.296682	0.00926853	0.0397918	0.000566955	387.09	75.9175	263.805	7.26006	251.542	3.51758	251.542	3.51758
C21-60	9.57748	81.7555	235.519	0.347129	0.050612	0.00262844	0.278495	0.0143819	0.040012	0.000697537	233.4	120.353	249.463	11.4234	252.907	4.32577	252.907	4.32577
C21-61	505.4	720.222	874.196	0.823868	0.158164	0.00276802	10.8842	0.27849	0.496141	0.0107328	2436.11	29.9375	2513.29	23.8554	2597.19	46.2655	2436.11	29.9375
C21-62	86.2468	112.136	141.205	0.794136	0.164876	0.00295872	11.5736	0.238326	0.506651	0.00781906	2506.48	30.2475	2570.55	19.3252	2642.32	33.4853	2506.48	30.2475
C21-63	210.619	275.053	1158.23	0.237476	0.0768944	0.00139377	1.95575	0.0410464	0.183419	0.00279016	1118.21	35.1875	1100.42	14.1204	1085.63	15.2101	1118.21	35.1875
C21-64	163.983	372.49	1913.61	0.194653	0.0694641	0.00170334	0.764942	0.0215585	0.0809224	0.00227226	922.22	50.465	576.857	12.4089	501.626	13.554	501.626	13.554
C21-65	27.5617	117.075	632.271	0.185165	0.0539487	0.00162877	0.339127	0.0112622	0.0451493	0.000674535	368.57	68.51	296.51	8.54185	284.672	4.16333	284.672	4.16333
C21-66	20.8397	233.352	487.678	0.478495	0.0529113	0.00214157	0.308942	0.0136424	0.0419129	0.000622383	324.13	90.73	273.361	10.5845	264.679	3.85339	264.679	3.85339
C21-67	69.0133	79.424	453.027	0.175318	0.0703693	0.00162722	1.56513	0.042028	0.159979	0.00261928	938.885	43.52	956.501	16.6491	956.661	14.5654	956.661	14.5654
C21-68	12.0175	54.3755	309.822	0.175506	0.0540828	0.00205174	0.300292	0.0110387	0.0402277	0.000602264	375.98	85.175	266.628	8.6219	254.244	3.73483	254.244	3.73483
C21-69	18.6152	201.337	435.729	0.46207	0.0530788	0.00204911	0.304292	0.0120169	0.0412564	0.000666129	331.54	87.0275	269.747	9.35689	260.616	4.1264	260.616	4.1264
C21-70	22.0763	73.5164	400.083	0.183753	0.0582217	0.00259112	0.502191	0.0257362	0.0630733	0.00217899	538.925	96.2825	413.185	17.3983	394.289	13.215	394.289	13.215
C21-72	87.1752	220.989	578.149	0.382236	0.0729285	0.00149603	1.46242	0.0340898	0.144566	0.00248674	1012.96	41.825	915.006	14.0708	870.432	14.0137	870.432	14.0137
C21-73	65.563	91.9365	206.041	0.446205	0.102264	0.00269938	4.24199	0.110676	0.300686	0.00490009	1665.73	48.61	1682.19	21.4685	1694.71	24.3029	1665.73	48.61
C21-74	15.5577	126.394	390.635	0.323562	0.0476869	0.00413257	0.270259	0.0254316	0.040614	0.00112854	83.425	192.565	242.9	20.3315	256.638	6.99111	256.638	6.99111
C21-75	34.2014	346.849	773.515	0.448407	0.0523672	0.00193269	0.308139	0.0116408	0.0425224	0.000694755	301.91	83.3225	272.737	9.03751	268.449	4.29845	268.449	4.29845
C21-76	22.899	98.8156	386.239	0.25584	0.0584803	0.00197486	0.481004	0.0163131	0.0597637	0.000979562	546.33	74.0625	398.761	11.1876	374.188	5.96198	374.188	5.96198
C21-77	20.6248	117.051	439.674	0.266223	0.0557627	0.00288053	0.358614	0.0179565	0.0470846	0.00100318	442.64	114.805	311.179	13.4218	296.598	6.17818	296.598	6.17818
C21-78	17.6157	84.589	462.296	0.182976	0.0530276	0.00192402	0.291547	0.0113291	0.0394439	0.000623056	331.54	76.845	259.777	8.90842	249.385	3.86641	249.385	3.86641
C21-79	16.3003	116.506	403.611	0.288659	0.0528925	0.00189427	0.305645	0.0115196	0.041636	0.000690822	324.13	113.877	270.8	8.9605	262.966	4.27768	262.966	4.27768
C21-80	52.8543	367.403	610.091	0.602211	0.0613963	0.002154	0.635835	0.0207436	0.0758586	0.0011402	653.72	75.9125	499.724	12.8803	471.356	6.83667	471.356	6.83667
C21-81	10.6802	50.3638	79.8339	0.630857	0.069712	0.00253495	1.23103	0.0490405	0.127847	0.00280007	920.37	75.9275	814.807	22.3261	775.573	16.0098	775.573	16.0098
C21-83	40.0588	56.1147	978.878	0.0573256	0.0506658	0.00177513	0.306368	0.0103932	0.0441381	0.000621343	233.4	81.4675	271.362	8.08028	278.432	3.83906	278.432	3.83906
C21-84	125.886	380.001	471.325	0.80624	0.0858724	0.00192158	2.91949	0.0844178	0.244024	0.00436808	1400	48.6125	1386.97	21.8896	1407.58	22.6478	1400	48.6125
C21-85	63.1113	152.263	1198.93	0.126999	0.0584982	0.0018089	0.464385	0.0199339	0.0563419	0.0014549	550.035	66.655	387.303	13.8244	353.34	8.88071	353.34	8.88071
C21-86	81.1936	174.742	437.492	0.399418	0.0873026	0.00165201	2.16354	0.0465209	0.178782	0.00260468	1368.52	35.955	1169.41	14.9527	1060.32	14.2558	1368.52	35.955
C21-87	1.90059	57.1131	85.6845	0.666551	0.0564298	0.00640201	0.148562	0.0140035	0.0206476	0.000691474	477.82	253.667	140.641	12.3801	131.747	4.36793	131.747	4.36793
C21-88	207.112	155.369	891.549	0.174269	0.0969016	0.00278123	2.87744	0.0875232	0.21461	0.00360963	1565.13	53.705	1376.02	22.9235	1253.33	19.1578	1565.13	53.705
C21-89	122.079	325.362	457.154	0.711712	0.0872074	0.00154501	2.9266	0.0574228	0.242394	0.00326744	1364.81	33.7975	1388.81	14.879	1399.13	16.9706	1364.81	33.7975
C21-90	143.198	2431.37	2872.79	0.846344	0.0563247	0.00161449	0.334479	0.00963711	0.0430038	0.000589884	464.86	30.5525	292.98	7.33542	271.425	3.6488	271.425	3.6488
C21-91	13.0369	88.7899	262.062	0.338813	0.0587299	0.00434062	0.364313	0.0264303	0.0453547	0.00125518	566.7	161.09	315.43	19.6731	285.939	7.74035	285.939	7.74035
C21-92	35.2209	241.457	354.649	0.680833	0.0596708	0.00205884	0.744298	0.0249558	0.0910355	0.00145554	590.77	74.0625	564.911	14.5322	561.658	8.60546	561.658	8.60546
C21-93	22.7809	184.043	273.262	0.673504	0.0535219	0.00262945	0.5574	0.0266482	0.0760166	0.00124592	350.055	111.1	449.833	17.3766	472.302	7.46868	472.302	7.46868
C21-94	31.0035	94.5489	173.575	0.544713	0.0754389	0.00266785	1.73351	0.0604951	0.167572	0.00283356	1079.63	70.3725	1021.05	22.4821	998.72	15.654	998.72	15.654
C21-95	14.5454	100.334	358.19	0.280113	0.0550502	0.00278738	0.312612	0.0162638	0.0416037	0.000836546	413.01	112.95	276.203	12.5824	262.766	5.17927	262.766	5.17927
C21-96	124.035	74.0511	575.109	0.12876	0.0816192	0.00187837	2.53017	0.0647743	0.224054	0.00345429	1236.11	45.215	1280.75	18.6514	1303.26	18.2054	1236.11	45.215
C22-1: Basaltic andesitic - andesitic pyroclastic rocks; GPS(10°24.939′N,123°48.361′E)
C22-1-22	8.93593	331.786	265.813	1.24819	0.0438702	0.00487905	0.111362	0.0108568	0.0184053	0.000461945	n/a	n/a	107.211	9.91945	117.569	2.92476	117.569	2.92476
C22-1-1	3.01009	79.0414	74.2445	1.06461	0.0479918	0.0123722	0.131319	0.0192381	0.0198674	0.000874395	98.24	518.445	125.282	17.2668	126.818	5.52733	126.818	5.52733
C22-1-5	7.714	296.017	250.07	1.18374	0.0447796	0.00556119	0.123632	0.0118841	0.020041	0.000433946	n/a	n/a	118.359	10.7395	127.915	2.7433	127.915	2.7433
C22-1-6	5.31543	132.062	209.028	0.631793	0.0500023	0.00531531	0.132345	0.0106697	0.0191899	0.000484195	194.525	238.855	126.202	9.56802	122.534	3.06327	122.534	3.06327
C22-1-7	5.34386	170.623	181.002	0.942661	0.0533129	0.00595401	0.145016	0.0141041	0.0197225	0.000484347	342.65	249.045	137.501	12.5076	125.902	3.06267	125.902	3.06267
C22-1-8	11.9421	496.443	336.281	1.47627	0.0441707	0.00376123	0.123126	0.00929541	0.0202122	0.00038404	n/a	n/a	117.902	8.40407	128.997	2.42763	128.997	2.42763
C22-1-9	4.09319	135.42	133.07	1.01766	0.0466238	0.012653	0.128371	0.0228788	0.0199653	0.00063063	31.58	544.38	122.633	20.588	127.437	3.98632	127.437	3.98632
C22-1-11	13.073	574.334	316.671	1.81366	0.0526768	0.00539587	0.143934	0.0138659	0.0198145	0.000439435	322.28	233.305	136.542	12.3081	126.484	2.77858	126.484	2.77858
C22-1-12	17.4701	804.433	400.266	2.00975	0.0489869	0.00448209	0.13148	0.00874702	0.0194637	0.000417245	146.38	203.675	125.427	7.84998	124.265	2.63923	124.265	2.63923
C22-1-13	4.97416	152.909	146.442	1.04416	0.0496843	0.00638104	0.134503	0.0124365	0.0196317	0.000570722	188.97	264.78	128.136	11.131	125.328	3.60891	125.328	3.60891
C22-1-17	6.63645	192.66	189.223	1.01816	0.050506	0.00697207	0.136441	0.0150431	0.0195882	0.000574273	216.74	292.56	129.869	13.4409	125.053	3.63151	125.053	3.63151
C22-1-19	4.26642	108.244	122.642	0.882603	0.0510546	0.00733804	0.140369	0.0175329	0.0199353	0.000668734	242.66	303.67	133.373	15.6115	127.247	4.22723	127.247	4.22723
C22-1-21	4.59803	159.484	143.605	1.11057	0.0448701	0.00550717	0.123117	0.0120108	0.0198948	0.000521276	n/a	n/a	117.894	10.859	126.991	3.29553	126.991	3.29553
C22-1-24	6.10608	189.36	153.425	1.23422	0.0451857	0.00674204	0.125609	0.0178883	0.0201553	0.000761732	n/a	n/a	120.145	16.1368	128.637	4.81393	128.637	4.81393
C22-1-25	3.56819	112.72	102.909	1.09533	0.0542111	0.0106782	0.151147	0.0179955	0.0202152	0.000742783	388.94	383.285	142.924	15.8734	129.016	4.69393	129.016	4.69393
C22-1-4	7.06166	241.418	205.67	1.17381	0.0456855	0.00631745	0.135877	0.0148581	0.0215971	0.000494547	n/a	n/a	129.365	13.2822	137.742	3.12154	137.742	3.12154
C22-1-10	5.38499	164.792	152.753	1.07881	0.0528887	0.00774519	0.160606	0.0164827	0.0220205	0.000607034	324.13	303.665	151.233	14.4206	140.413	3.82963	140.413	3.82963
C22-1-14	5.33228	158.654	165.433	0.959026	0.0479193	0.00624627	0.14061	0.0164103	0.0212789	0.000593732	94.535	294.405	133.587	14.6089	135.734	3.74841	135.734	3.74841
C22-1-15	5.92211	222.839	168.645	1.32134	0.0461351	0.00706041	0.13391	0.0140893	0.0210483	0.000640543	n/a	n/a	127.605	12.6169	134.278	4.04473	134.278	4.04473
C22-1-16	3.88338	123.004	126.177	0.974847	0.0523764	0.0083851	0.148075	0.0175059	0.0204996	0.000618114	301.91	329.59	140.21	15.4829	130.812	3.90521	130.812	3.90521
C22-1-20	3.88893	116.328	126.024	0.923062	0.0499776	0.00879608	0.148686	0.0178589	0.0215714	0.000667835	194.525	372.175	140.751	15.7867	137.579	4.21489	137.579	4.21489
C22-1-2	8.15548	291.958	204.579	1.42712	0.0519147	0.00572014	0.165208	0.0144116	0.0231113	0.000487421	283.395	253.673	155.251	12.5589	147.289	3.07217	147.289	3.07217
C22-1-3	5.40541	90.9885	137.481	0.661825	0.0454697	0.0170052	0.142792	0.0262481	0.0228077	0.00105758	n/a	n/a	135.528	23.3219	145.376	6.66602	145.376	6.66602
C22-1-26	10.5186	499.797	422.605	1.18266	0.0517411	0.003669	0.140451	0.00961571	0.0205517	0.000482945	272.285	162.942	133.445	8.56168	131.142	3.05139	131.142	3.05139
C22-1-28	9.05346	460.262	369.355	1.24613	0.0481502	0.00265574	0.125877	0.00626826	0.01942	0.000345562	105.645	125.905	120.386	5.65368	123.989	2.18623	123.989	2.18623
C22-1-29	6.52707	260.626	285.244	0.913693	0.0504341	0.00243706	0.13607	0.00646563	0.0197759	0.000359309	216.74	112.945	129.537	5.77945	126.24	2.27236	126.24	2.27236
C22-1-30	4.05934	144.634	186.024	0.777501	0.0494679	0.00357351	0.124195	0.00771874	0.0194003	0.000412786	168.6	162.94	118.868	6.97211	123.865	2.6112	123.865	2.6112
C22-1-31	3.40439	169.714	139.32	1.21816	0.0525758	0.0040024	0.139325	0.00939675	0.0196883	0.000404246	309.32	174.053	132.443	8.375	125.686	2.55652	125.686	2.55652
C22-1-32	4.1549	186.541	164.283	1.13548	0.0515209	0.0030371	0.142393	0.00819675	0.0205986	0.000451469	264.88	135.167	135.173	7.28603	131.438	2.8525	131.438	2.8525
C22-1-33	58.7374	1306.33	2925.26	0.44657	0.0479506	0.00122917	0.13927	0.00413243	0.0209571	0.000381836	98.24	65.735	132.394	3.68416	133.702	2.41203	133.702	2.41203
C22-1-34	14.8558	1196.17	414.526	2.88562	0.0533054	0.00235889	0.149328	0.0066612	0.0203151	0.000370969	342.65	99.99	141.318	5.88568	129.647	2.34485	129.647	2.34485
C22-1-35	5.05924	197.84	207.425	0.953791	0.0522162	0.00338226	0.142389	0.00893542	0.0203868	0.000421351	294.505	148.127	135.169	7.94255	130.1	2.66286	130.1	2.66286
C22-1-36	61.0032	3729.81	2104.05	1.77268	0.0486604	0.00117526	0.138932	0.00357427	0.0205775	0.000266271	131.57	57.4025	132.092	3.18781	131.305	1.68338	131.305	1.68338
C22-1-37	6.41799	390.051	244.699	1.59401	0.0486282	0.00327468	0.12414	0.00801602	0.0190255	0.000351211	131.57	148.12	118.818	7.24095	121.494	2.22275	121.494	2.22275
C22-1-38	2.29449	106.545	97.8891	1.08842	0.0575626	0.00470464	0.138657	0.0093196	0.0190921	0.000477989	522.26	179.607	131.847	8.31112	121.915	3.0243	121.915	3.0243
C22-1-40	11.3581	578.43	455.009	1.27125	0.0530002	0.00253582	0.135344	0.00568471	0.0189867	0.000312432	327.835	109.245	128.889	5.08482	121.249	1.97763	121.249	1.97763
C22-1-41	3.26795	170.782	129.294	1.32088	0.0512273	0.00411021	0.132109	0.0105591	0.0200776	0.000495746	250.065	189.79	125.991	9.47075	128.147	3.13365	128.147	3.13365
C22-1-42	7.07024	307.907	277.284	1.11044	0.0478245	0.00266152	0.138847	0.00795933	0.0214889	0.000469988	100.09	116.65	132.017	7.09702	137.059	2.96693	137.059	2.96693
C22-1-43	2.9375	122.992	123.1	0.999119	0.0558336	0.0049064	0.14614	0.0109004	0.0204634	0.000544199	455.6	196.273	138.498	9.65729	130.584	3.43851	130.584	3.43851
C22-1-44	5.62121	253.595	218.027	1.16314	0.0540572	0.00591262	0.145906	0.017423	0.020919	0.000619012	372.275	252.743	138.29	15.4388	133.461	3.90931	133.461	3.90931
C22-1-45	1.58613	60.4839	70.9261	0.852773	0.0564237	0.00773145	0.134008	0.015446	0.0194026	0.000871775	477.82	307.365	127.692	13.8305	123.88	5.51326	123.88	5.51326
C22-1-46	4.84325	176.934	186.093	0.950781	0.0551729	0.00347032	0.159593	0.00973955	0.0213975	0.000430434	420.42	140.727	150.346	8.52893	136.482	2.71763	136.482	2.71763
C22-1-47	12.7002	397.287	602.869	0.658994	0.0490021	0.0024169	0.131615	0.0059176	0.0197404	0.000348448	146.38	116.65	125.548	5.31047	126.015	2.20381	126.015	2.20381
C22-1-48	2.13322	100.23	91.223	1.09874	0.0543255	0.0050283	0.133528	0.0115159	0.0190325	0.000597957	383.385	213.86	127.263	10.316	121.539	3.78325	121.539	3.78325
C22-1-49	10.7406	810.245	337.377	2.4016	0.0507551	0.00247409	0.137908	0.00657654	0.0200863	0.000365093	231.55	108.317	131.179	5.86909	128.201	2.30824	128.201	2.30824
C22-1-50	9.24419	446.622	331.386	1.34774	0.0548613	0.00515767	0.149105	0.0123797	0.0210795	0.000480016	405.605	208.303	141.122	10.9395	134.475	3.03137	134.475	3.03137
C22-1-51	10.6584	527.777	390.18	1.35265	0.0515358	0.00223588	0.146362	0.00618578	0.0208534	0.000335452	264.88	99.985	138.695	5.47983	133.047	2.11951	133.047	2.11951
C22-1-52	5.9707	332.2	210.802	1.57589	0.0513504	0.00337133	0.144291	0.00924133	0.0205058	0.000434093	257.47	184.235	136.859	8.20079	130.852	2.74302	130.852	2.74302
C22-1-53	13.3516	1010.75	482.432	2.09512	0.0519004	0.00218415	0.132024	0.00548013	0.0184555	0.000298059	279.69	93.505	125.914	4.91621	117.887	1.88767	117.887	1.88767
C22-1-54	3.22975	122.696	132.185	0.928217	0.053037	0.00582091	0.141498	0.0133929	0.0208002	0.000623389	331.54	249.97	134.377	11.9135	132.711	3.93739	132.711	3.93739
C22-1-55	8.54726	433.927	323.728	1.34041	0.0511727	0.00264493	0.140597	0.00697371	0.0203083	0.000377236	255.62	120.355	133.576	6.20881	129.604	2.38445	129.604	2.38445
C22-1-56	3.58891	154.921	158.692	0.976239	0.0498911	0.00445573	0.131793	0.0117512	0.0192393	0.000446741	190.82	196.27	125.708	10.5429	122.847	2.82629	122.847	2.82629
C22-1-57	5.60452	261.35	222.957	1.1722	0.0500625	0.00349045	0.134057	0.00850759	0.0203003	0.000438975	198.23	160.165	127.736	7.61781	129.554	2.77439	129.554	2.77439
C22-1-58	7.61632	409.225	299.662	1.36562	0.0480859	0.00253998	0.130325	0.00717755	0.0196289	0.000355217	101.94	131.46	124.39	6.44822	125.31	2.24682	125.31	2.24682
C22-1-59	6.66671	348.514	267.501	1.30285	0.0501898	0.0026853	0.131998	0.00658484	0.0192735	0.000364141	211.185	124.055	125.892	5.90711	123.063	2.30398	123.063	2.30398
C22-1-60	12.0509	68.6304	313.947	0.218605	0.0517591	0.00746212	0.282731	0.042812	0.0393357	0.00139267	275.99	299.97	252.821	33.9016	248.714	8.63797	248.714	8.63797
C22-1-61	6.2972	355.065	236.336	1.50238	0.0469643	0.00288492	0.127378	0.00761382	0.0199868	0.000423043	55.65	131.47	121.739	6.85796	127.572	2.67456	127.572	2.67456
C22-1-62	23.9545	1615.05	840.429	1.92169	0.0461989	0.00151317	0.125249	0.00405526	0.0196144	0.00026605	9.36	74.065	119.819	3.66023	125.219	1.68343	125.219	1.68343
C22-1-63	10.4611	443.619	273.023	1.62484	0.0529614	0.00429591	0.143936	0.0110554	0.0200788	0.000502521	327.835	185.16	136.543	9.81337	128.154	3.1757	128.154	3.1757
C22-1-64	6.26325	259.336	236.23	1.09781	0.0585001	0.00592441	0.155505	0.0133711	0.021519	0.000553789	550.035	228.675	146.761	11.7501	137.249	3.49554	137.249	3.49554
C22-1-65	14.0902	875.455	525.113	1.66718	0.0493767	0.00198271	0.128994	0.00542014	0.0187635	0.000324837	164.9	89.8	123.193	4.87543	119.837	2.05648	119.837	2.05648
C22-1-66	4.59415	211.482	196.382	1.07689	0.0538453	0.00354426	0.140638	0.00893761	0.01943	0.000415904	364.87	148.132	133.612	7.95668	124.053	2.63084	124.053	2.63084
C22-1-67	3.19235	153.849	139.664	1.10156	0.0467285	0.00344346	0.117689	0.00784164	0.0187411	0.000417452	35.28	175.905	112.975	7.12429	119.695	2.64235	119.695	2.64235
C22-1-68	2.5163	105.314	100.837	1.04441	0.0515802	0.00413728	0.138533	0.0100271	0.0201801	0.000493489	333.39	182.385	131.737	8.94294	128.794	3.11908	128.794	3.11908
C22-1-69	4.71267	229.611	204.901	1.1206	0.0529084	0.00584683	0.122509	0.010154	0.0184923	0.000512361	324.13	256.45	117.344	9.18534	118.12	3.24355	118.12	3.24355
C22-1-70	4.53582	210.003	195.815	1.07246	0.0520706	0.00349931	0.135252	0.00832586	0.019531	0.000431385	287.1	153.683	128.806	7.44726	124.691	2.72844	124.691	2.72844
C22-1-71	1.80279	65.1999	86.369	0.754899	0.0538699	0.00554795	0.12762	0.0107403	0.0190574	0.000586217	364.87	230.525	121.957	9.67164	121.696	3.70891	121.696	3.70891
C22-1-72	16.382	770.501	729.706	1.05591	0.051143	0.00170654	0.133124	0.00463116	0.0187837	0.000294326	255.62	77.765	126.901	4.15084	119.964	1.86349	119.964	1.86349
C22-1-73	11.8101	810.352	450.416	1.79912	0.0486661	0.00238048	0.126309	0.00591221	0.0188013	0.000321568	131.57	114.8	120.776	5.33057	120.075	2.03574	120.075	2.03574
C22-1-74	12.1839	774.016	451.921	1.71272	0.0503598	0.00263291	0.133105	0.00664537	0.0195221	0.000366451	213.035	120.353	126.884	5.95558	124.635	2.31804	124.635	2.31804
C22-1-75	3.31013	140.617	130.45	1.07794	0.0521417	0.00384827	0.139527	0.00945345	0.020062	0.000501872	300.06	165.72	132.622	8.42404	128.048	3.1724	128.048	3.1724
C22-1-77	9.10457	585.55	281.541	2.0798	0.0514429	0.00471639	0.14185	0.0124112	0.0210679	0.000521189	261.175	211.085	134.69	11.037	134.402	3.29128	134.402	3.29128
C22-1-78	9.04792	442.588	350.394	1.26312	0.0494316	0.00242362	0.137527	0.00657441	0.020304	0.000391185	168.6	114.797	130.839	5.86914	129.577	2.47255	129.577	2.47255
C22-1-79	8.24531	392.448	336.838	1.16509	0.0511647	0.00253463	0.135847	0.00647455	0.0194923	0.000329893	255.62	117.575	129.338	5.78855	124.447	2.08705	124.447	2.08705
C22-1-80	5.42032	259.488	215.276	1.20538	0.0502648	0.00366389	0.135138	0.00931919	0.0201329	0.000544568	205.63	170.347	128.704	8.3365	128.496	3.44193	128.496	3.44193
C22-1-81	13.1908	524.799	321.43	1.6327	0.0577829	0.00522288	0.147134	0.0129877	0.020419	0.00068095	520.41	199.975	139.378	11.4965	130.303	4.30185	130.303	4.30185
C22-1-82	2.13625	81.8098	92.0765	0.888498	0.0634237	0.0104391	0.141818	0.0125647	0.0192653	0.0006375	724.08	355.53	134.662	11.1737	123.011	4.03246	123.011	4.03246
C22-1-83	1.98684	77.321	86.4553	0.894346	0.0489206	0.00469355	0.128943	0.0127114	0.0196405	0.000554685	142.68	211.08	123.148	11.4331	125.384	3.50751	125.384	3.50751
C22-1-84	3.66568	142.92	154.16	0.927087	0.0537307	0.00444257	0.144388	0.0102085	0.0205068	0.000559699	366.72	219.415	136.945	9.0582	130.858	3.53626	130.858	3.53626
C22-1-86	4.33761	199.493	173.55	1.14948	0.0511092	0.00495034	0.132184	0.0114743	0.0197282	0.000482036	255.62	224.048	126.058	10.291	125.938	3.04804	125.938	3.04804
C22-1-87	8.19806	511.914	291.743	1.75468	0.0519158	0.00312888	0.141107	0.00800784	0.0200537	0.000404746	283.395	106.468	134.029	7.12614	127.996	2.5588	127.996	2.5588
C22-1-88	7.18465	349.103	284.196	1.22839	0.0539791	0.00318402	0.140251	0.00784388	0.0192757	0.00039091	368.57	133.32	133.268	6.98549	123.076	2.47321	123.076	2.47321
C22-1-89	12.7641	522.948	261.451	2.00017	0.0510782	0.00598807	0.153063	0.0167772	0.0215713	0.000871283	242.66	251.825	144.613	14.775	137.579	5.49805	137.579	5.49805
C22-1-90	11.9853	669.178	456.361	1.46633	0.0545395	0.00237917	0.147177	0.00619477	0.0198097	0.000355684	394.495	93.51	139.416	5.4839	126.453	2.24939	126.453	2.24939
C22-1-91	5.4398	161.311	244.246	0.660446	0.0489736	0.00287273	0.133481	0.00747391	0.0199994	0.000391262	146.38	-60.18	127.221	6.69576	127.652	2.47374	127.652	2.47374
C22-1-92	22.3741	239.215	552.648	0.432853	0.0510566	0.00150299	0.281152	0.00871014	0.039585	0.000599113	242.66	68.5075	251.571	6.90538	250.26	3.71753	250.26	3.71753
C22-1-93	7.61694	381.83	285.448	1.33765	0.051191	0.00316471	0.141206	0.00778778	0.0205288	0.000399197	250.065	142.575	134.118	6.92974	130.997	2.52262	130.997	2.52262
C22-1-94	4.45762	194.041	188.586	1.02893	0.0533611	0.00418236	0.137259	0.00903363	0.0192973	0.000449495	342.65	177.755	130.599	8.06602	123.213	2.84355	123.213	2.84355
C22-1-95	18.0296	889.561	781.452	1.13834	0.0494791	0.00178267	0.126898	0.00448132	0.0185761	0.000303607	172.305	85.1725	121.307	4.0387	118.651	1.92255	118.651	1.92255
C22-1-96	2.78639	112.021	117.381	0.954333	0.0490089	0.00485192	0.131043	0.0123687	0.0196418	0.000630723	150.085	214.785	125.035	11.1042	125.391	3.98815	125.391	3.98815
C22-1-97	4.53084	184.903	180.952	1.02183	0.0600607	0.00745866	0.138207	0.0123836	0.020283	0.000679322	605.575	265.71	131.446	11.0477	129.444	4.2927	129.444	4.2927
C22-1-98	5.61393	330.41	208.981	1.58105	0.0489752	0.00334159	0.126486	0.00841288	0.0193202	0.000420141	146.38	151.83	120.935	7.58359	123.358	2.6579	123.358	2.6579
C22-1-100	3.16086	136.338	140.756	0.968608	0.0520945	0.00526942	0.131653	0.0121185	0.0194666	0.000506947	300.06	233.305	125.582	10.8738	124.284	3.20629	124.284	3.20629
C22-1-101	2.44304	102.917	104.886	0.981232	0.0559832	0.00498749	0.140843	0.0107562	0.0198181	0.000606875	450.045	199.975	133.794	9.5738	126.506	3.83675	126.506	3.83675
C22-1-102	3.20541	123.461	142.227	0.868056	0.0532491	0.00525528	0.135559	0.01197	0.0188551	0.000503133	338.945	225.898	129.08	10.7035	120.416	3.18404	120.416	3.18404
C22-1-103	14.6306	599.541	626.118	0.957553	0.0508287	0.00195806	0.138669	0.00553396	0.0196992	0.000308272	231.55	88.875	131.858	4.9356	125.754	1.95004	125.754	1.95004
C22-1-104	5.29548	144.038	152.145	0.946717	0.053168	0.00333062	0.205829	0.0112993	0.0290232	0.000593983	344.5	142.572	190.046	9.51559	184.432	3.7224	184.432	3.7224
C22-1-105	10.5948	688.695	383.744	1.79467	0.0513562	0.00250107	0.136986	0.00662488	0.0194804	0.000331589	257.47	111.095	130.356	5.917	124.371	2.09779	124.371	2.09779
C22-1-106	1.92764	73.8602	81.2887	0.908616	0.0510616	0.00511342	0.124703	0.0120375	0.0193699	0.00052106	242.66	214.79	119.327	10.8678	123.673	3.29582	123.673	3.29582
C22-1-107	30.47	1675.58	1101.19	1.52161	0.0501731	0.00200752	0.13982	0.00555284	0.0201825	0.000295851	211.185	94.43	132.884	4.94745	128.809	1.87074	128.809	1.87074
C15-1: Andesite; GPS(10°22.091′N,123°52.718′E)
C24-2	1.33325	414.536	425.321	0.974641	0.0451726	0.0285293	0.0127277	0.00335797	0.00204298	0.000109046	n/a	n/a	12.8419	3.36679	13.1565	0.701558	13.1565	0.701558
C24-8	0.513429	86.134	165.714	0.519776	0.046131	0.0247788	0.0148688	0.00445653	0.00233718	0.00013965	400.05	554.575	14.9864	4.4588	15.0489	0.898178	15.0489	0.898178
C24-11	1.25681	297.907	323.852	0.919887	0.0464154	0.0143469	0.0142217	0.00455633	0.0022218	0.000112458	20.47	611.03	14.3387	4.56156	14.3068	0.723382	14.3068	0.723382
C24-13	0.989201	81.1823	164.938	0.492199	0.0409548	0.0158837	0.0129132	0.00861828	0.0022864	0.00020012	n/a	n/a	13.0279	8.6393	14.7223	1.28714	14.7223	1.28714
C24-14	0.34345	73.8811	96.0586	0.769125	0.0447196	0.0462701	0.0137722	0.0261055	0.00223322	0.000225071	n/a	n/a	13.8886	26.147	14.3802	1.44769	14.3802	1.44769
C24-22	0.528974	106.666	130.278	0.818757	0.0463487	0.0167753	0.0148243	0.012402	0.00231934	0.000231644	16.765	705.465	14.9419	12.4088	14.9341	1.48984	14.9341	1.48984
C24-24	0.391056	55.1034	105.595	0.521837	0.0461939	0.0343999	0.0142525	0.00314718	0.00223738	0.000219249	9.36	1203.6	14.3695	3.1507	14.4069	1.41024	14.4069	1.41024
C24-26	1.25232	372.817	325.281	1.14614	0.0470459	0.0417159	0.0140913	0.0067185	0.00217207	0.000168496	50.095	1348.98	14.2082	6.72707	13.9869	1.08387	13.9869	1.08387
C24-27	0.355482	59.0538	105.048	0.56216	0.0460595	0.0277998	0.014392	0.0120396	0.00226594	0.000241961	400.05	638.845	14.5092	12.0513	14.5907	1.55627	14.5907	1.55627
C24-28	10.1279	211.44	363.692	0.58137	0.0494296	0.00580759	0.139769	0.0165983	0.0205059	0.000530847	168.6	251.82	132.838	14.7872	130.853	3.35404	130.853	3.35404
C24-5	46.5506	325.411	1048.15	0.310463	0.0518251	0.00188256	0.293136	0.010637	0.041014	0.000529438	275.99	87.95	261.025	8.35412	259.115	3.2815	259.115	3.2815
C24-12	42.8889	290.53	967.803	0.300196	0.0509726	0.00207453	0.29098	0.0119469	0.0413951	0.00053662	238.955	94.43	259.331	9.39817	261.474	3.32477	261.474	3.32477
C24-18	26.8576	324.261	573.136	0.565766	0.0558902	0.0028081	0.292444	0.0148729	0.0379434	0.000679883	455.6	117.58	260.481	11.686	240.073	4.22458	240.073	4.22458
C24-23	15.196	108.551	334.398	0.324615	0.0529497	0.0036524	0.289503	0.0179519	0.0396479	0.0006529	327.835	157.387	258.168	14.1368	250.65	4.05061	250.65	4.05061
C24-7	4.54099	116.669	32.2693	3.61549	0.059174	0.0126095	0.379041	0.0565905	0.0464476	0.00208335	572.255	477.73	326.332	41.668	292.675	12.835	292.675	12.835
C24-1	70.9621	71.2631	430.804	0.165419	0.0760138	0.00314149	1.58914	0.0619348	0.151584	0.00247768	1095.37	82.8725	965.959	24.2979	909.836	13.8784	909.836	13.8784
C24-19	99.5583	213.334	515.306	0.413995	0.0694902	0.00225505	1.62098	0.049782	0.169154	0.00206887	922.22	66.67	978.37	19.2973	1007.45	11.4202	1007.45	11.4202
C24-25	76.7708	131.225	247.814	0.529529	0.0865104	0.00280927	2.98567	0.0932103	0.250272	0.0027369	1349.99	61.88	1403.98	23.7653	1439.88	14.1329	1349.99	61.88
C24-29	143.645	248.506	308.621	0.805216	0.109	0.00328236	4.95026	0.145779	0.329354	0.00406125	1783.34	54.4775	1810.87	24.9069	1835.25	19.7191	1783.34	54.4775
C24-30	209.202	410.758	565.515	0.726343	0.104952	0.00314682	4.04665	0.117488	0.279622	0.00362029	1713.27	55.5575	1643.63	23.6648	1589.46	18.2583	1713.27	55.5575
C24-15	345.967	531.402	495.088	1.07335	0.158613	0.0040023	9.54283	0.25841	0.436282	0.00664109	2442.59	42.59	2391.68	24.9406	2333.97	29.8336	2442.59	42.59
C24-31	15.3964	134.549	386.908	0.347754	0.0486164	0.00191766	0.263021	0.0108342	0.0393509	0.000569488	127.865	92.58	237.098	8.71147	248.808	3.53471	248.808	3.53471
C24-33	11.8877	84.3794	152.791	0.552255	0.0584385	0.00183263	0.5639	0.0184552	0.0702607	0.00108596	546.33	68.505	454.062	11.9863	437.726	6.54525	437.726	6.54525
C24-36	13.0542	97.8477	308.607	0.317062	0.0539874	0.00171716	0.319722	0.0120911	0.0430632	0.00109687	372.275	70.3625	281.689	9.30473	271.792	6.78055	271.792	6.78055
C24-37	59.5127	198.004	941.872	0.210224	0.0590967	0.00134606	0.515625	0.0136867	0.0627118	0.0010508	572.255	49.99	422.224	9.16959	392.096	6.37414	392.096	6.37414
C24-39	146.092	405.64	526.326	0.770701	0.0952188	0.00225725	2.92155	0.0596854	0.222641	0.003004	1532.41	44.6	1387.51	15.4827	1295.82	15.8541	1532.41	44.6
C24-41	92.7827	201.674	270.877	0.744522	0.0988315	0.00183314	3.9532	0.0787302	0.288479	0.00385318	1602.16	33.7925	1624.65	16.1771	1633.92	19.2981	1602.16	33.7925
C24-42	73.8255	547.485	1397.02	0.391894	0.0559042	0.0016722	0.369339	0.0111588	0.0477355	0.000774089	450.045	66.66	319.163	8.27727	300.604	4.76551	300.604	4.76551
C24-43	19.6776	187.658	444.044	0.422611	0.0544933	0.00158252	0.292948	0.00773135	0.0392621	0.000508233	390.79	64.81	260.877	6.0742	248.258	3.15536	248.258	3.15536
C24-44	99.9	964.137	1701.11	0.56677	0.0548566	0.00187999	0.359286	0.0113637	0.0471945	0.000665061	405.605	75.9175	311.682	8.48886	297.274	4.09404	297.274	4.09404
C24-45	132.792	66.107	952.566	0.0693988	0.0719599	0.00126163	1.35407	0.0244656	0.135679	0.00145394	984.88	35.1875	869.314	10.5693	820.181	8.2648	820.181	8.2648
C24-48	166.328	195.265	335.058	0.582779	0.142976	0.00218351	8.40024	0.1533	0.424081	0.00575532	2264.82	31.635	2275.2	16.6311	2278.98	26.0818	2264.82	31.635
C24-49	48.6522	389.715	977.255	0.398786	0.0563399	0.0017479	0.324585	0.0105979	0.0415973	0.00058308	464.86	68.5125	285.423	8.12419	262.726	3.60867	262.726	3.60867
C24-50	16.4679	169.905	393.875	0.431368	0.0548994	0.0017867	0.288684	0.0102053	0.0377047	0.000518245	409.31	67.585	257.523	8.04287	238.59	3.22201	238.59	3.22201
C24-51	25.2203	102.431	442.997	0.231222	0.0517984	0.0036535	0.346931	0.0225038	0.0490428	0.00148883	275.99	162.942	302.41	16.966	308.642	9.14892	308.642	9.14892
C24-54	82.3193	573.781	1651.99	0.347327	0.0557227	0.00161095	0.296949	0.00841881	0.0383594	0.000554053	442.64	64.8075	264.014	6.59119	242.656	3.43971	242.656	3.43971
C24-55	32.8005	133.287	341.575	0.390212	0.0649627	0.0015945	0.78279	0.0181185	0.0860712	0.000977087	772.225	56.475	587.074	10.3271	532.259	5.80665	532.259	5.80665
C24-59	116.205	161.681	641.62	0.251989	0.0727557	0.00115501	1.7122	0.0335157	0.169205	0.00241322	1007.1	31.4825	1013.11	12.5664	1007.73	13.3164	1007.1	31.4825
C24-60	110.048	1280.44	1033.87	1.2385	0.0633037	0.00163819	0.674357	0.0194005	0.0763675	0.000903792	718.22	55.55	523.358	11.7705	474.404	5.41891	474.404	5.41891
B14: Andesitic pyroclastic rocks; GPS(10°6.711′N,124°16.268′E)
B14-13	10.3405	628.846	1738.7	0.361676	0.0472822	0.00162021	0.0328734	0.00116594	0.00504132	5.32693e-05	64.91	77.77	32.8422	1.14642	32.4168	0.342122	32.4168	0.342122
B14-14	9.57798	1032.16	1578.6	0.653845	0.0479809	0.00175318	0.0316425	0.00124119	0.00478187	6.82147e-05	98.24	87.0275	31.6314	1.22182	30.7525	0.437962	30.7525	0.437962
B14-16	8.50466	585.863	1477.12	0.396624	0.047503	0.0016235	0.0315092	0.00114823	0.00480958	7.12646e-05	76.02	77.77	31.5002	1.13048	30.9302	0.457507	30.9302	0.457507
B14-2	14.7158	606.622	861.4	0.704228	0.0481009	0.00126045	0.091784	0.00239296	0.0138365	0.000153253	105.645	61.105	89.1639	2.22633	88.5846	0.975622	88.5846	0.975622
B14-8	11.5245	642.617	612.391	1.04936	0.0501871	0.00175285	0.0952015	0.00285399	0.013755	0.000161903	211.185	81.4675	92.3373	2.64673	88.066	1.03063	88.066	1.03063
B14-9	12.5952	735.523	718.685	1.02343	0.049252	0.00170493	0.0858789	0.00263366	0.0126435	0.000206409	166.75	81.4675	83.6571	2.46333	80.9942	1.31471	80.9942	1.31471
B14-5	12.2641	374.894	520.679	0.72001	0.0497654	0.00140321	0.127708	0.00342461	0.018608	0.00019302	183.415	69.4325	122.036	3.08462	118.853	1.22324	118.853	1.22324
B14-7	7.11677	214.838	330.169	0.65069	0.0475416	0.00226681	0.113319	0.00483513	0.0172837	0.000219977	76.02	111.1	108.997	4.41042	110.466	1.39524	110.466	1.39524
B14-12	7.10389	271.143	317.351	0.854394	0.0496418	0.00195478	0.114945	0.00418694	0.0167896	0.000204808	188.97	124.983	110.478	3.8138	107.334	1.29977	107.334	1.29977
B14-3	25.0363	292.972	520.209	0.563182	0.0508613	0.00102454	0.277806	0.00568737	0.0396065	0.000409135	235.25	46.285	248.915	4.52252	250.393	2.54057	250.393	2.54057
B14-10	23.2457	55.4264	289.4	0.191522	0.0568129	0.00112401	0.562723	0.0121426	0.0718209	0.000757797	483.375	44.44	453.297	7.89572	447.117	4.56413	447.117	4.56413
B14-11	26.4668	90.5226	328.503	0.275561	0.060899	0.00121051	0.578353	0.0115739	0.0688626	0.000812621	635.2	44.435	463.402	7.45236	429.3	4.90648	429.3	4.90648
B14-4	57.2044	34.1828	507.505	0.0673547	0.0608206	0.000796168	0.879394	0.0146929	0.104844	0.00110965	631.5	27.775	640.655	7.95011	642.735	6.48376	642.735	6.48376
B14-1	79.4014	70.6606	135.18	0.522714	0.162017	0.00185526	10.1196	0.137454	0.452913	0.00433848	2476.84	19.45	2445.76	12.6613	2408.19	19.2932	2476.84	19.45
B14-6	135.787	144.855	237.382	0.610219	0.162957	0.00228352	9.70622	0.274263	0.431903	0.00854088	2486.73	23.7675	2407.29	26.0627	2314.29	38.4713	2486.73	23.7675
B17: Basalt; GPS(10°9.248′N,124°13.84′E)
B17-3	9.06976	508.75	1512.07	0.336459	0.0478607	0.00154677	0.034021	0.00099071	0.00515439	5.98292e-05	100.09	77.77	33.9697	0.973126	33.142	0.384123	33.142	0.384123
B17-4	6.14692	486.761	980.447	0.496468	0.04593	0.00198371	0.0328222	0.00152413	0.00518181	8.83936e-05	n/a	n/a	32.7918	1.49856	33.3178	0.56717	33.3178	0.56717
B17-5	9.07229	742.809	1486.64	0.499657	0.0495375	0.00165899	0.034236	0.00111531	0.00501143	5.60654e-05	172.305	74.9875	34.1809	1.09522	32.2251	0.36004	32.2251	0.36004
B17-7	6.31205	598.564	1049.59	0.570286	0.0509377	0.00245997	0.0340758	0.00155587	0.00485087	6.55609e-05	238.955	111.095	34.0235	1.52792	31.1951	0.42093	31.1951	0.42093
B17-15	1.34859	98.768	215.721	0.457851	0.0510627	0.00876631	0.0377221	0.00516323	0.0053565	0.000153421	242.66	355.51	37.5976	5.05215	34.4381	0.983925	34.4381	0.983925
B17-17	8.6176	581.713	1516.43	0.383606	0.0489933	0.00172774	0.031961	0.00106356	0.0047302	4.88138e-05	146.38	83.32	31.9449	1.0467	30.4209	0.313623	30.4209	0.313623
B17-14	1.54876	100.686	215.967	0.466212	0.0484594	0.00494077	0.0396077	0.00384596	0.00592637	0.000141949	120.46	225.89	39.441	3.75644	38.0911	0.909906	38.0911	0.909906
B17-1	9.07483	321.297	393.135	0.817267	0.0498402	0.00180934	0.120514	0.0042486	0.0175324	0.000205196	187.12	115.725	115.538	3.85078	112.042	1.30139	112.042	1.30139
B17-2	6.65194	186.934	284.037	0.658134	0.0492939	0.00234371	0.126852	0.00607278	0.0186593	0.000341114	161.195	138.87	121.265	5.47268	119.177	2.15964	119.177	2.15964
B17-9	19.4403	574.183	831.282	0.69072	0.0519258	0.00127575	0.132356	0.00323917	0.0184831	0.000218771	283.395	55.55	126.212	2.90583	118.062	1.38616	118.062	1.38616
B17-10	4.27876	224.985	193.619	1.162	0.0455414	0.00354032	0.0981129	0.00811744	0.0156219	0.000292676	n/a	n/a	95.0329	7.50617	99.927	1.85848	99.927	1.85848
B17-11	3.22283	95.6266	145.02	0.659401	0.0521864	0.00302272	0.124708	0.00718492	0.0173274	0.000282177	294.505	126.835	119.331	6.48704	110.743	1.78904	110.743	1.78904
B17-12	18.279	502.468	934.063	0.537939	0.0491606	0.00123191	0.107954	0.00266085	0.0159224	0.000151532	153.79	59.25	104.092	2.43956	101.834	0.963098	101.834	0.963098
B17-13	8.58519	208.046	393.775	0.528338	0.0497596	0.00215148	0.121245	0.00513872	0.0176674	0.000277393	183.415	99.985	116.2	4.65422	112.897	1.75821	112.897	1.75821
B17-6	4.71958	55.8052	92.3648	0.604182	0.0512568	0.00216881	0.287133	0.0120631	0.0406204	0.000567924	253.77	96.28	256.3	9.51781	256.677	3.5209	256.677	3.5209
B17-8	51.6132	713.898	565.989	1.26133	0.0558431	0.000855559	0.487523	0.00885787	0.0633052	0.000706377	455.6	33.33	403.221	6.05259	395.695	4.28782	395.695	4.28782
B18: Andesitic pyroclastic rocks; GPS(10°6.109′N,124°8.214′E)
B18-5	0.931382	64.5495	110.19	0.585802	0.0495987	0.00448768	0.0466441	0.00290549	0.00681928	0.000126626	176.01	199.97	46.2902	2.81889	43.8107	0.811099	43.8107	0.811099
B18-10	0.224682	9.51171	28.9767	0.328254	0.0507119	0.00898701	0.0468706	0.00524735	0.00670199	0.000182514	227.845	366.625	46.5099	5.08962	43.0596	1.16896	43.0596	1.16896
B18-12	0.529206	25.6065	62.6342	0.408827	0.0481909	0.00986597	0.0478505	0.00576525	0.00720008	0.000164771	109.35	422.17	47.46	5.58671	46.2484	1.05488	46.2484	1.05488
B18-13	0.176469	7.94318	23.7308	0.33472	0.0482429	0.0482889	0.0426881	0.0142935	0.00641489	0.000463696	109.35	1448.98	42.4451	13.9192	41.221	2.97021	41.221	2.97021
B18-25	1.34938	40.7213	137.547	0.296055	0.0479252	0.00368277	0.0525272	0.00333792	0.00794739	0.000143302	94.535	238.855	51.9817	3.22032	51.0297	0.916914	51.0297	0.916914
B18-1	6.88526	196.466	262.102	0.749579	0.0488235	0.00219998	0.116794	0.00453737	0.0177737	0.000287562	138.975	105.54	112.161	4.12606	113.571	1.8224	113.571	1.8224
B18-2	8.13093	249.361	299.078	0.833765	0.0497594	0.00165009	0.123074	0.00434399	0.0179633	0.000224168	183.415	75.9125	117.855	3.92826	114.771	1.42093	114.771	1.42093
B18-3	13.0767	569.563	372.187	1.53031	0.0510173	0.00144197	0.124493	0.00346756	0.0177486	0.00019896	242.66	64.8025	119.137	3.13215	113.412	1.2617	113.412	1.2617
B18-7	8.96319	184.082	382.085	0.481784	0.0517655	0.00143024	0.129362	0.00374703	0.0181671	0.000234509	275.99	67.585	123.524	3.36991	116.062	1.48609	116.062	1.48609
B18-8	2.16428	35.5431	86.4768	0.411013	0.0555076	0.00285519	0.147773	0.00711084	0.0199631	0.000401558	431.53	110.175	139.944	6.29135	127.423	2.53888	127.423	2.53888
B18-9	4.48179	103.659	211.536	0.490033	0.0474992	0.00165578	0.116481	0.00407637	0.0177821	0.000167232	76.02	77.77	111.877	3.70803	113.623	1.06099	113.623	1.06099
B18-11	5.01601	123.33	233.575	0.528009	0.0488538	0.00147245	0.119828	0.00344993	0.0177858	0.000156461	138.975	65.73	114.916	3.12913	113.647	0.992888	113.647	0.992888
B18-14	2.88789	75.5368	137.923	0.547672	0.0522437	0.0027224	0.124299	0.00624817	0.0172526	0.00027561	294.505	118.502	118.962	5.64346	110.269	1.74758	110.269	1.74758
B18-16	6.83376	240.738	301.822	0.797617	0.0525284	0.00147892	0.126395	0.00301393	0.0174491	0.000153409	309.32	64.8075	120.853	2.71813	111.514	0.973841	111.514	0.973841
B18-20	4.1041	105.453	188.255	0.560162	0.051445	0.0017605	0.125419	0.00369533	0.0176791	0.000187174	261.175	77.765	119.973	3.33503	112.971	1.18721	112.971	1.18721
B18-21	2.98024	96.8436	117.578	0.823651	0.0497889	0.00252728	0.132242	0.00559133	0.0192609	0.000251002	183.415	118.502	126.11	5.01498	122.983	1.58887	122.983	1.58887
B18-22	6.88855	167.438	324.143	0.516556	0.0514064	0.00160283	0.124106	0.00344781	0.017507	0.000161434	257.47	70.3575	118.787	3.11539	111.881	1.02455	111.881	1.02455
B19-1: Basalt; GPS(10°8.533′N,124°15.011′E)
B19-1-1	22.9348	935.092	1152.71	0.811211	0.0532632	0.00172232	0.111552	0.00356088	0.0151863	0.00020987	338.945	74.065	107.384	3.25362	97.1613	1.3337	97.1613	1.3337
B19-1-3	16.8975	1091.7	844.568	1.29261	0.050762	0.00129481	0.0971276	0.0024884	0.0138742	0.000167452	231.55	59.25	94.1214	2.30388	88.8243	1.06577	88.8243	1.06577
B19-1-4	18.7696	115.765	418.097	0.276886	0.0507087	0.001089	0.275571	0.00650972	0.0394057	0.000419011	227.845	49.99	247.138	5.1846	249.148	2.60219	249.148	2.60219
B19-1-2	10.3103	71.4897	147.627	0.484258	0.056783	0.00188038	0.45049	0.0149749	0.0575269	0.000752427	483.375	72.215	377.622	10.486	360.568	4.59074	360.568	4.59074
B20: Andesite; GPS(10°9.256′N,124°14.209′E)
B20-2-2	1.37019	100.093	201.044	0.497866	0.0503228	0.00475313	0.0384356	0.00275567	0.00553806	0.000141496	209.33	207.385	38.2956	2.69462	35.6021	0.90732	35.6021	0.90732
B20-2-7	1.53291	88.4276	216.509	0.408425	0.0511226	0.00561458	0.0406242	0.00388751	0.00576173	0.000148189	255.62	224.05	40.4333	3.79331	37.0359	0.950029	37.0359	0.950029
B20-2-6	46.1268	2776.67	1748.82	1.58774	0.0518638	0.000888181	0.12208	0.0021503	0.0170672	0.000157581	279.69	38.885	116.956	1.94745	109.094	1.00052	109.094	1.00052
B20-2-4	27.2523	286.188	556.699	0.51408	0.0522879	0.00111936	0.291377	0.00568049	0.0404053	0.000437738	298.21	45.365	259.643	4.46994	255.345	2.71575	255.345	2.71575
B20-2-1	24.2059	167.433	311.284	0.53788	0.0555807	0.00110773	0.484086	0.00945127	0.0631529	0.000699036	435.23	44.44	400.873	6.47212	394.772	4.24395	394.772	4.24395
B6: Basalt; GPS(10.1532°N,124.2378°E)
B6-41	19.1598	551.725	807.74	0.683047	0.0528608	0.00483915	0.122954	0.00967368	0.0168772	0.000392583	324.13	207.382	117.747	8.74738	107.889	2.48943	107.889	2.48943
B6-42	15.0245	485.745	609.113	0.797462	0.0468522	0.0027874	0.113607	0.00652394	0.0175831	0.000306387	42.69	146.28	109.26	5.94897	112.363	1.94192	112.363	1.94192
B6-38	17.6258	212.836	585.637	0.363426	0.0494503	0.00292845	0.19172	0.011205	0.0280973	0.00047324	168.6	134.24	178.096	9.54778	178.629	2.9689	178.629	2.9689
B6-39	14.8076	171.476	469.848	0.364961	0.0531536	0.00295602	0.209242	0.0111356	0.0285438	0.000448614	344.5	123.132	192.916	9.35135	181.428	2.8134	181.428	2.8134
B6-37	19.8391	120.367	544.81	0.220934	0.0504388	0.00388855	0.276437	0.0209196	0.039694	0.00131192	216.74	174.977	247.827	16.642	250.936	8.13543	250.936	8.13543
B6-40	124.98	56.0913	420.074	0.133527	0.121992	0.00338747	4.91862	0.147974	0.292355	0.00435187	1987.04	49.84	1805.46	25.4157	1653.29	21.726	1987.04	49.84
B8: Andesite; GPS(10.1532°N,124.2378°E)
B8-54-1	1.83682	114.14	235.748	0.48416	0.0468783	0.0102502	0.0432918	0.00549	0.00669803	0.000421514	42.69	455.5	43.0328	5.34322	43.0343	2.69928	43.0343	2.69928
B8-56	5.61759	128.835	255.259	0.504724	0.0510868	0.00626223	0.118338	0.0118228	0.016797	0.000426606	255.62	249.975	113.564	10.7347	107.381	2.70527	107.381	2.70527
B8-55-1	7.162	204.873	306.179	0.669129	0.0532748	0.0045498	0.132328	0.00955154	0.018011	0.000416684	338.945	162.018	126.187	8.5655	115.073	2.63933	115.073	2.63933
B8-55-2	8.89478	262.727	375.857	0.699007	0.0515157	0.00572555	0.11465	0.0124507	0.0161348	0.000433853	264.88	237.01	110.21	11.3421	103.182	2.75295	103.182	2.75295
B8-55	8.88717	249.557	394.884	0.631976	0.0484532	0.00395976	0.118142	0.00929089	0.0176793	0.000410993	120.46	181.45	113.386	8.4374	112.972	2.60412	112.972	2.60412
B8-50	5.14946	62.6656	125.823	0.498044	0.0494678	0.00859833	0.252415	0.0351316	0.0370605	0.00212303	168.6	362.92	228.536	28.483	234.587	13.1975	234.587	13.1975
B8-49	16.2868	197.978	289.183	0.684609	0.0570113	0.00403969	0.335197	0.0216051	0.0426336	0.000779225	500.04	157.387	293.525	16.4314	269.136	4.82	269.136	4.82
B8-48	3.18927	33.8923	60.684	0.558505	0.0547153	0.00833633	0.305698	0.0405424	0.0405153	0.00152274	466.71	346.252	270.841	31.5285	256.026	9.43503	256.026	9.43503
B8-44	23.6983	284.54	404.992	0.702581	0.0568176	0.00545492	0.302082	0.0267561	0.0386961	0.00133679	483.375	212.938	268.025	20.8656	244.746	8.29753	244.746	8.29753
B8-53	4.16999	30.112	74.575	0.403781	0.056319	0.00634316	0.383863	0.0354174	0.0494135	0.00142298	464.86	251.817	329.876	25.9878	310.92	8.74279	310.92	8.74279
B8-52	6.82399	56.6405	140.226	0.403922	0.0559917	0.00690767	0.352925	0.0498509	0.0457348	0.00233707	453.75	277.74	306.919	37.4142	288.282	14.4077	288.282	14.4077
B8-51	37.8074	463.759	522.312	0.887895	0.0522658	0.00216511	0.357957	0.0155638	0.0496571	0.000721061	298.21	94.43	310.689	11.6394	312.416	4.43157	312.416	4.43157
B8-45	12.6527	154.066	217.074	0.709738	0.0531807	0.00437277	0.338553	0.0230701	0.0461793	0.00174756	344.5	191.643	296.074	17.5014	291.022	10.7694	291.022	10.7694
B8-54-2	27.1832	108.738	240.004	0.453067	0.0630415	0.00323434	0.771881	0.0537064	0.0887693	0.00341091	709.27	109.248	580.842	30.7792	548.254	20.1976	548.254	20.1976
B8-54	43.3576	195.005	277.095	0.703749	0.0601204	0.00366357	1.00409	0.0674124	0.121089	0.00349118	609.28	133.315	705.884	34.1582	736.831	20.0787	736.831	20.0787
B8-43	135.416	161.969	1169.48	0.138496	0.0696452	0.0061723	1.32314	0.123173	0.13815	0.00447099	918.21	187.96	855.888	53.8386	834.193	25.3274	834.193	25.3274
B8-46	184.466	125.597	607.287	0.206817	0.113742	0.00510231	4.6037	0.206989	0.293815	0.00572609	1861.12	81.175	1749.94	37.525	1660.57	28.5443	1861.12	81.175
B12-2: Andesite; GPS(10.1542°N,124.2305°E)
B12-64	8.30636	225.634	273.989	0.823516	0.0514334	0.00438448	0.149466	0.011574	0.0210713	0.000481393	261.175	202.752	141.441	10.2244	134.423	3.04008	134.423	3.04008
B12-65	4.79411	124.861	169.876	0.735012	0.050628	0.00532793	0.15057	0.0134962	0.021565	0.000530958	233.4	216.645	142.415	11.9108	137.539	3.35134	137.539	3.35134
B12-67	9.30783	195.185	339.183	0.575457	0.0515601	0.00447627	0.158627	0.0121741	0.0223084	0.000393199	264.88	199.975	149.5	10.6695	142.229	2.4806	142.229	2.4806
B12-66	10.0132	244.013	351.486	0.694233	0.0513704	0.0038718	0.151951	0.0102791	0.0214487	0.000430394	257.47	172.2	143.633	9.06097	136.805	2.71725	136.805	2.71725
B12-60-1	28.8301	190.24	668.24	0.284689	0.0580102	0.00630502	0.362841	0.0324263	0.0451288	0.00151109	531.52	240.713	314.334	24.1602	284.546	9.32178	284.546	9.32178
B12-60	4.03707	38.0135	88.7388	0.428376	0.0508932	0.030405	0.307731	0.0976929	0.0437682	0.00302078	235.25	993.45	272.421	75.8535	276.148	18.6572	276.148	18.6572
B12-57-1	3.87659	43.1	63.4522	0.679252	0.0557209	0.00751253	0.343566	0.0415165	0.0447156	0.00133647	442.64	303.663	299.87	31.3763	281.996	8.24808	281.996	8.24808
B12-57-2	3.89023	42.0205	68.1277	0.61679	0.0528429	0.00833367	0.321306	0.0491729	0.0440955	0.00130156	320.43	335.14	282.906	37.7884	278.169	8.03747	278.169	8.03747
B12-57-3	3.7481	39.0304	61.6764	0.632826	0.0539113	0.00650857	0.343634	0.0385782	0.046215	0.00123637	368.57	271.26	299.922	29.1542	291.242	7.6197	291.242	7.6197
B12-57	4.73349	49.0135	81.8828	0.598582	0.0523413	0.00525177	0.325422	0.0298052	0.0450727	0.00115321	301.91	234.23	286.065	22.8341	284.2	7.11507	284.2	7.11507
B12-61	8.75298	72.2787	127.455	0.567092	0.0577851	0.00715688	0.41727	0.0508306	0.0524764	0.00222991	520.41	269.413	354.097	36.4177	329.707	13.6594	329.707	13.6594
B12-63	192.988	75.353	584.966	0.128816	0.115643	0.0042958	5.2058	0.194952	0.326428	0.00493172	1900	66.9775	1853.57	31.9226	1821.05	23.9882	1900	66.9775
B12-62	130.354	180.36	194.242	0.928531	0.16305	0.0061564	9.93294	0.393884	0.441712	0.00986653	2487.34	58.18	2428.57	36.6187	2358.3	44.1352	2487.34	58.18
	Note: For zircon younger than 1000 Ma, 206Pb/238U ages were used, and 207Pb/206Pb ages were used for zircons older than 1000 Ma
